1 **Potassium channels contribute to activity-dependent scaling of dendritic inhibition.**

2

3 Jeremy T. Chang and Michael J. Higley

4

5 Department of Neuroscience

6 Program in Cellular Neuroscience, Neurodegeneration and Repair

7 Kavli Institute

8 Yale School of Medicine

9 New Haven, CT 06510

10

11

12

13

14 Correspondence: m.higley@yale.edu

15

16

17

18

19 **Abstract**

20

21 GABAergic inhibition plays a critical role in the regulation of neuronal activity. In the neocortex,  
22 inhibitory interneurons that target the dendrites of pyramidal cells influence both electrical and  
23 biochemical postsynaptic signaling. Voltage-gated ion channels strongly shape dendritic excitability and  
24 the integration of excitatory inputs, but their contribution to GABAergic signaling is less well understood.  
25 Here, we examine the actions of potassium channels in regulating dendritic inhibition in mouse visual  
26 cortex. By combining 2-photon calcium imaging and focal GABA uncaging, we show that A-type channels  
27 normally suppress the GABAergic inhibition of calcium signals evoked by back-propagating action  
28 potentials in dendritic spines and shafts. Moreover, the voltage-dependent inactivation of these channels  
29 leads to enhancement of dendritic inhibition following somatic spiking. Overall, our findings highlight the  
30 interaction between intrinsic and synaptic properties and reveal a novel mechanism for the activity-  
31 dependent scaling of GABAergic inhibition.

## 32 Introduction

33 Inhibition in the neocortex is primarily mediated by the neurotransmitter gamma-aminobutyric acid  
34 (GABA) through synaptic contacts made by interneurons. These synapses are distributed across the  
35 entire somatodendritic arbor and work to counteract excitatory glutamatergic input. GABAergic synapses  
36 that target the axon initial segment and soma exert a strong influence on somatic voltage, and  
37 consequently play important roles in regulating the generation and timing of action potentials (Higley and  
38 Contreras, 2006; Pouille and Scanziani, 2001; Wehr and Zador, 2003; Zhu et al., 2004). However, the  
39 vast majority of inhibitory inputs are formed onto pyramidal cell dendrites (Beaulieu and Somogyi, 1990),  
40 and the role of dendrite-targeting inhibition has been an area of growing interest (Bloss et al., 2016;  
41 Lovett-Barron et al., 2012; Miles et al., 1996). One important function of dendritic inhibition, in addition to  
42 action potential regulation, is the regulation of dendritic calcium signals which are thought to play an  
43 instructive role in synaptic plasticity (Chiu et al., 2013; Palmer et al., 2012; Tsubokawa and Ross, 1996).  
44 Recent reports in the neocortex and hippocampus have described varying efficacy of dendritic calcium  
45 inhibition, ranging from spatial compartmentalization within individual spines to complete abolition of  
46 actively propagating action potentials (Chiu et al., 2013; Kanemoto et al., 2011; Marlin and Carter, 2014;  
47 Mullner et al., 2015; Stokes et al., 2014). The mechanisms underlying this heterogeneity are unclear, but  
48 one contributing factor may be variations in intrinsic dendritic properties, like voltage-dependent channels,  
49 whose impact on GABAergic inhibition is not well understood.

50 The expression of voltage-gated ion channels within neuronal dendrites regulates cellular  
51 excitability and strongly influences synaptic integration (Cook and Johnston, 1999; Johnston and  
52 Narayanan, 2008; Miller et al., 1985; Poirazi and Mel, 2001; Shepherd et al., 1985). One example is the  
53 A-type potassium (KA) conductance, characterized by fast inactivation and sensitivity to 4-aminopyridine  
54 (4-AP) (Bekkers, 2000; Clark et al., 2008; Korngreen and Sakmann, 2000; Serodio and Rudy, 1998).  
55 Within cortical and hippocampal pyramidal neurons, KA channels are expressed throughout the dendritic  
56 arbor and have been implicated in the regulation of back-propagating action potentials (bAPs) and  
57 excitatory synaptic integration (Cai et al., 2004; Carrasquillo et al., 2012; Gasparini, 2011; Harnett et al.,  
58 2013; Hoffman et al., 1997; Ramakers and Storm, 2002). Despite clearly influencing dendritic excitation,  
59 KA channels have been shown to preferentially co-localize with GABAergic synapses, suggesting they  
60 may also play a role in the control of inhibition (Burkhalter et al., 2006; Jinno et al., 2005).

61 Here, we examine how voltage-gated potassium channels alter GABAergic inhibition of bAP-  
62 evoked  $\text{Ca}^{2+}$  signals ( $\Delta\text{Ca}^{2+}$ ) in dendrites of L5 pyramidal neurons in mouse visual cortex. We show that  
63 the blockade of these channels specifically in the apical dendrite enhances both the amplitude and  
64 inhibition of bAP-evoked  $\Delta\text{Ca}^{2+}$ . Moreover, our data suggest the involvement of dendritic Kv4 channels,  
65 previously shown to play a role in dendritic excitability. We also show that the voltage-dependent  
66 inactivation of these channels gives rise to a scaling of dendritic GABAergic inhibition, such that inhibitory  
67 efficacy is enhanced following strong somatic activity. Thus, our findings demonstrate that intrinsic  
68 excitability interacts with GABAergic synaptic input to dynamically regulate dendritic  $\text{Ca}^{2+}$  signaling.

69

## 70 Results

71 In order to investigate the impact of potassium channels on dendritic inhibition, we performed  
72 two-photon calcium imaging of bAP-evoked dendritic Ca<sup>2+</sup> transients in layer 5 pyramidal neurons  
73 (L5PNs) of mouse visual cortex (Figure 1A). Ca<sup>2+</sup> signals were measured in dendritic spines and  
74 neighboring shafts along the primary apical dendrite, 100-150 μm from the soma (Figure 1B). To probe  
75 the effects of GABAergic inhibition on ΔCa<sup>2+</sup>, we compared uninhibited ΔCa<sup>2+</sup> from bAPs induced by  
76 somatic current injection with ΔCa<sup>2+</sup> from bAPs preceded (15 ms) by local (at the imaging site) uncaging  
77 of RuBi-GABA (Rial Verde et al., 2008). To compare observations across different recordings, GABAergic  
78 inhibition of ΔCa<sup>2+</sup> was quantified as in previous studies as  $(\Delta Ca_{2+}^{C_{II}} - \Delta Ca_{2+}^{Inh}) / \Delta Ca_{2+}^{C_{II}}$  (Chiu et al.,  
79 2013). The magnitude of this Ca<sup>2+</sup> inhibition was measured before and after bath-application of the  
80 potassium channel blocker 4-aminopyridine (4-AP)(Figure 1A). Treatment with 4-AP broadened the  
81 somatic action potential (p=0.0020)(Figure 1C) and increased the average peak ΔCa<sup>2+</sup> evoked by a  
82 single bAP for both spines (p=0.0059) and neighboring shafts (p=0.0137) (Figure 1D-G). Moreover, 4-AP  
83 significantly enhanced the average GABAergic inhibition of ΔCa<sup>2+</sup> for both spines (p=0.0195) and  
84 neighboring shafts (p=0.0098) (Figure 1D-G). Importantly, this result was not seen when slices were pre-  
85 treated with the GABA<sub>A</sub>R antagonist picrotoxin (Figure 1 - figure supplement 1) nor with application of  
86 control saline, which demonstrated the presence of a run-down in peak ΔCa<sup>2+</sup> over time without change  
87 in Ca<sup>2+</sup> inhibition (Figure 1 - figure supplement 2), consistent with previous findings (Canepari et al.,  
88 2007; Chalifoux and Carter, 2011; Fukumoto et al., 2012; Kameyama et al., 1989).

89 Given the enhanced GABAergic inhibition of dendritic ΔCa<sup>2+</sup> following 4-AP treatment, we next  
90 asked whether 4-AP also altered the somatic inhibitory postsynaptic potential (IPSP) evoked by  
91 GABAergic dendritic input. We analyzed IPSPs evoked by either single uncaging events or bursts of three  
92 uncaging events (10 Hz), directed to the proximal apical dendrite as above. In the presence of 4-AP,  
93 IPSP amplitude was enhanced for both single (p=0.0391) and triple (p=0.0039) uncaging protocols  
94 (Figure 1— figure supplement 3A-C). Concurrent with the increase in IPSP amplitude, the decay of the  
95 IPSP was also significantly slowed after treatment with 4-AP (p=0.0039), leading to enhanced temporal  
96 summation for bursts of IPSPs (Figure 1—figure supplement 3C-D). The IPSP alterations could be  
97 explained by a significant increase in somatic input resistance measured using a series of negative  
98 current steps (p=0.0391)(Figure 1—figure supplement 3E). In sum, these data suggest voltage-  
99 dependent potassium channels normally suppress the somatic and dendritic effects of GABAergic  
100 inhibition in the apical dendrite.

101 Next, we asked whether the actions of 4-AP-sensitive channels on inhibition of dendritic ΔCa<sup>2+</sup>  
102 generalized to other subcellular regions, as previous reports have suggested differential contributions to  
103 excitability in basal and apical dendrites (Sandler et al., 2016). We performed similar imaging experiments  
104 in basal dendrites (100-150 μm from the soma) (Figure 1—figure supplement 4A-D). Again, the bAP-  
105 evoked ΔCa<sup>2+</sup> was significantly increased by 4-AP for both spines (p= 0.0026) and neighboring shafts

106 ( $p=0.0020$ ). However, GABAergic inhibition of  $\Delta\text{Ca}^{2+}$  was much stronger in the basal dendrites and was  
107 not further enhanced by application of 4-AP for either spines ( $p=0.1602$ ) or neighboring shafts ( $p=$   
108  $0.2754$ ) (Figure 1—figure supplement 3B-D). Note that while the fractional inhibition of  $\Delta\text{Ca}^{2+}$  was not  
109 altered, the absolute inhibition of  $\Delta\text{Ca}^{2+}$  influx was enhanced by 4-AP. Thus, our results suggest that  
110 potassium channels differentially shape GABAergic efficacy in apical versus basal dendrites.

111 As bath application of 4-AP altered both somatic and apical dendritic effects of GABAergic  
112 inhibition, we investigated whether these actions arise from similar or distinct pools of potassium  
113 channels. We used a puffer pipette to locally apply 4-AP at different locations along the somatodendritic  
114 axis. When applied to the proximal apical dendrite (at the site of GABA uncaging), 4-AP replicated the  
115 effects of bath-application on the magnitude of bAP-evoked  $\Delta\text{Ca}^{2+}$  and its inhibition by GABA.  
116 Specifically, 4-AP increased  $\Delta\text{Ca}^{2+}$  in spines ( $p=0.0156$ ) and neighboring shafts ( $p=0.0313$ ) (Figure 2A-  
117 D). GABAergic inhibition of  $\Delta\text{Ca}^{2+}$  was also enhanced in spines ( $p=0.0469$ ) and neighboring shafts  
118 ( $p=0.0313$ ) (Figure 2A-D). In contrast, application of 4-AP to either the cell body or apical tuft had no  
119 impact on peak  $\Delta\text{Ca}^{2+}$  or its inhibition by GABA within the proximal apical dendrite (Figure 2— figure  
120 supplement 1A-G). Conversely, the effects of bath-applied 4-AP on somatic IPSPs evoked by dendritic  
121 GABA uncaging were mimicked by focal application to the soma but not the proximal apical dendrite  
122 (Figure 2— figure supplement 2). Thus, our data suggest that the somatic and dendritic impacts of  
123 dendritic GABAergic inhibition are modulated by two spatially separated pools of potassium channels.

124 While 4-AP-sensitive potassium currents can be mediated by a variety of molecularly-defined  
125 channels, A-type Kv4.2 channels have been specifically linked to the control of dendritic excitability  
126 (Carrasquillo et al., 2012; Harnett et al., 2013; Losonczy et al., 2008; Sandler et al., 2016). We therefore  
127 investigated the contribution of these channels to the regulation of GABAergic inhibition using the  
128 scorpion toxin AmmTx3, which specifically blocks Kv4.2 and Kv4.3 channels in the presence of the  
129 auxiliary subunit dipeptidyl-peptidase-like-protein 6 (DPP6) (Maffie et al., 2013). Similar to our results with  
130 4-AP, GABAergic inhibition of bAP-evoked  $\Delta\text{Ca}^{2+}$  was significantly enhanced following bath application  
131 of 200 nM AmmTx3 for both spines ( $p=0.0195$ ) and neighboring shafts ( $p=0.0488$ ) (Figure 3A-D).  
132 Following AmmTx3 application, there was no change in the amplitude of the bAP-evoked  $\Delta\text{Ca}^{2+}$  in spines  
133 ( $p=0.3223$ ) and  $\Delta\text{Ca}^{2+}$  was significantly reduced in dendritic shafts ( $p=0.0137$ ) relative to baseline (Figure  
134 3B-D). However, the observation that  $\Delta\text{Ca}^{2+}$  exhibits considerable run-down over time (see Figure 1 -  
135 figure supplement 2) suggests that AmmTx3 likely produces a small enhancement of bAP-evoked  $\Delta\text{Ca}^{2+}$   
136 relative to control conditions that is masked by the run-down. Consistent with previous studies (Pathak et  
137 al., 2016), AmmTx3 had no effect on either somatic input resistance or IPSP amplitude (Figure 3— figure  
138 supplement 1).

139 As the effects of AmmTx3 application did not completely recapture those of 4-AP, we quantified  
140 the contribution of Kv4 channels to L5PN membrane currents by recording from somatic outside-out  
141 macropatches. Application of 4-AP blocked a fast outward current by  $-73.5 \pm 6.8\%$ . In contrast,  
142 application of AmmTx3 produced a significantly smaller  $-43.1 \pm 11.2\%$  change in current ( $p=0.0417$ ,

143 unpaired t-test), demonstrating that Kv4 channels sensitive to AmmTx3 constitute a fraction of the  
144 voltage-gated potassium channels blocked by 4-AP in L5PNs (Figure 3 - figure supplement 2). Altogether,  
145 these results suggest that the activity of A-type Kv4 channels is sufficient to influence dendritic Ca<sup>2+</sup>  
146 signaling and GABAergic inhibition.

147 One notable feature of KA channels is their fast, voltage-dependent inactivation, which limits their  
148 conductance during periods of high neuronal activity (Bekkers, 2000; Kim et al., 2005). We therefore  
149 asked whether KA channels might enable dendritic GABAergic inhibition to dynamically scale with  
150 somatic firing. To test this hypothesis, we compared GABAergic inhibition of  $\Delta$ Ca<sup>2+</sup> evoked by a bAP  
151 alone or preceded 20 ms by a train of 5 bAPs at 100 Hz (Figure 4A). Similar to 4-AP, the preceding train  
152 significantly enhanced the peak  $\Delta$ Ca<sup>2+</sup> for both spines ( $p=0.002$ ) and neighboring shafts ( $p=0.002$ ) and  
153 also enhanced GABAergic inhibition of  $\Delta$ Ca<sup>2+</sup> for spines ( $p=0.0059$ ) and neighboring shafts ( $p=0.002$ )  
154 (Figure 4B-D). In contrast, preceding spike trains at 50 Hz had minimal effect on either  $\Delta$ Ca<sup>2+</sup> amplitude  
155 or GABAergic inhibition (Figure 4— figure supplement 1A-D). Importantly, the ability of the 100 Hz train to  
156 enhance dendritic inhibition was occluded by prior bath application of 4-AP, suggesting that KA channels  
157 are required for activity-dependent scaling (Figure 4— figure supplement 1E-H).

158 We next asked whether activity-dependent scaling of inhibition could be seen with synaptic GABA  
159 release. To test this, we expressed channelrhodopsin-2 (ChR2) in a subset of dendrite-targeting cortical  
160 interneurons expressing somatostatin (SOM-INs)(Figure 5A). Brief pulses of blue light were used to  
161 activate SOM-INs and produce postsynaptic IPSPs. We repeated experiments comparing the GABAergic  
162 inhibition of  $\Delta$ Ca<sup>2+</sup> evoked by a bAP alone or preceded by a 100 Hz train. As with GABA uncaging, trains  
163 of somatic action potentials significantly enhanced the magnitude of  $\Delta$ Ca<sup>2+</sup> in spines ( $p=0.0098$ ) and  
164 neighboring shafts ( $p=0.0059$ ) and led to stronger GABAergic inhibition of  $\Delta$ Ca<sup>2+</sup> for both spines  
165 ( $p=0.0273$ ) and neighboring shafts ( $p=0.0273$ ) (Figure 5B-D). Taken together, these results demonstrate  
166 that KA channels in the apical dendrite play a key role in reducing the impact of synaptic GABAergic  
167 inhibition on bAP-evoked  $\Delta$ Ca<sup>2+</sup>.

168 Finally, to examine the biophysical mechanisms underlying the interaction of dendritic potassium  
169 channels with GABAergic signaling, we simulated an active dendritic compartment and tested the impact  
170 of varying voltage-gated conductances on the magnitude of Ca<sup>2+</sup> inhibition (Figure 6). We first explored  
171 whether increased GABAergic inhibition was mediated by 4-AP-induced enhancement of dendritic  
172 depolarization and the resulting increase in chloride driving force. The model revealed the surprising  
173 finding that increasing bAP-dependent depolarization by increasing the sodium reversal potential actually  
174 reduced GABAergic inhibition (Figure 6A-B). In contrast, reducing KA channel conductance recapitulated  
175 our data, increasing both bAP amplitude and the amount of Ca<sup>2+</sup> current inhibited by GABAergic  
176 signaling (Figure 6A-C). Thus, alterations in peak depolarization attained during the bAP alone do not  
177 account for the enhanced Ca<sup>2+</sup> inhibition (Figure 6D). Instead, we found that manipulations that  
178 increased the bAP duration (e.g., decreasing either  $E_{Na}$  or  $g_A$ ) led to increased Ca<sup>2+</sup> inhibition (Figure  
179 6E). This phenomenon is illustrated in Figure 6A, where similar inhibition of the bAP peak leads to greater

180 reduction in the integrated Ca<sup>2+</sup> current (yellow shaded areas) for broader bAP waveforms. In summary,  
181 these observations strongly suggest that the contribution of potassium conductance to bAP duration is an  
182 important factor in the magnitude of Ca<sup>2+</sup> inhibition.

183

## 184 **Discussion**

185 Rapidly activating and inactivating A-type potassium channels are widely recognized as key  
186 modulators of neuronal excitability as well as synaptic integration and plasticity (Carrasquillo et al., 2012;  
187 Foeger et al., 2012; Harnett et al., 2013; Hoffman et al., 1997; Losonczy et al., 2008; Magee and Carruth,  
188 1999). In the present work, we have described a role for KA channels in the regulation of dendritic  
189 GABAergic inhibition and its control over dendritic Ca<sup>2+</sup> signaling. Using a combination of  
190 electrophysiology, 2-photon Ca<sup>2+</sup> imaging, and focal GABA uncaging, we show that blocking KA  
191 channels either pharmacologically or via activity-dependent inactivation enhances both bAP-evoked Ca<sup>2+</sup>  
192 influx and GABAergic inhibition of these transients in the apical dendrites of L5PNs. Moreover, this  
193 modulation of dendritic signaling can occur in the absence of changes to the somatically recorded IPSP.  
194 These results provide evidence that KA channels compartmentalize their regulation of GABAergic  
195 signaling.

196 Dendritic potassium channels comprise a diverse molecular group, including both Kv1-, Kv3, and  
197 Kv4-type channels (Carrasquillo et al., 2012; Serodio et al., 1994). Our pharmacological analysis  
198 indicates a contribution from Kv4 channels, previously shown to be expressed in both cortical and  
199 hippocampal pyramidal dendrites. Indeed the ability of AmmTx3 to replicate the actions of 4-AP on  
200 GABAergic Ca<sup>2+</sup> inhibition suggests that Kv4 channels in L5PNs include the auxiliary subunit dipeptidyl-  
201 peptidase-like-protein 6 (DPP6), in agreement with previous studies (Foeger et al., 2012; Pathak et al.,  
202 2016). Nevertheless, AmmTx3 produces a smaller change in inhibition compared with 4-AP, suggesting  
203 that other voltage-gated potassium channels also play a role in regulating dendritic GABAergic signaling.  
204 This conclusion is supported by our data from outside-out somatic patches. Notably, the expression of  
205 Kv4.2 channels is regulated by the activity of NMDA-type glutamate receptors, indicating the possibility  
206 for multiple feedback loops within pyramidal neuron dendrites (Kim et al., 2007; Sandler et al., 2016).

207 Several previous studies have implicated KA channels in the regulation of both dendritic  
208 excitability and glutamatergic synaptic integration. In both CA1 and cortical pyramidal neurons, the  
209 presence of KA channels limits the spread of voltage between distinct compartments, such as the distal  
210 and proximal apical dendrite, regulating both the back propagation of action potentials and the spread of  
211 synaptically evoked dendritic spikes (Cai et al., 2004; Frick et al., 2003; Harnett et al., 2013; Kim et al.,  
212 2007; Kim et al., 2005; Losonczy et al., 2008). Our study demonstrates that KA channels similarly restrict  
213 the efficacy of GABAergic inhibition, suggesting that KA channels generally serve as dendritic “shock  
214 absorbers”, limiting the impact of synaptic inputs from all sources (Yuste, 1997). An intriguing possibility is  
215 that voltage-gated potassium channels asymmetrically regulate excitation and inhibition, potentially  
216 leading to moment-to-moment alterations of the balance between these opposing drives. Disruption of the

217 normal balance of excitatory and inhibitory signaling is thought to occur in a number of neuropsychiatric  
218 disorders, including autism and schizophrenia. Indeed, in Fragile X syndrome, loss of FMRP produces a  
219 dysregulation of KA channels that could lead to an imbalance of excitation and inhibition (Brager and  
220 Johnston, 2014; Gross et al., 2011; Kalmbach et al., 2015). Future studies are necessary to elucidate the  
221 precise role of KA channels in shaping glutamatergic and GABAergic integration.

222 In addition to regulating dendritic excitability, KA channels have been implicated in shaping long-  
223 term plasticity of glutamatergic synapses. In particular, studies have focused on spike-timing dependent  
224 plasticity (STDP), where bAPs can potentiate or depress synaptic inputs depending on their relative  
225 timing to synaptic activity (Magee and Johnston, 1997; Markram et al., 1997). For example, EPSPs in  
226 CA1 pyramidal neuron dendrites can inactivate KA channels, enhancing the dendritic invasion of somatic  
227 action potentials and subsequent plasticity (Hoffman et al., 1997). Recent experimental and  
228 computational studies have also suggested a key role for GABAergic inhibition in spike-timing dependent  
229 plasticity (Cichon and Gan, 2015; Hayama et al., 2013; Paille et al., 2013; Wilmes et al., 2016). For  
230 example, focal activation of GABAergic synapses in CA1 dendrites was shown to convert long-term  
231 potentiation to depression due to negative regulation of dendritic Ca<sup>2+</sup> influx (Hayama et al., 2013).  
232 Together, these various findings suggest that the interaction of NMDARs, KA channels, and GABAergic  
233 inhibition may strongly contribute to the development and maintenance of cortical circuits.

234 It is intriguing to speculate that expression patterns of KA channels may also explain some of the  
235 recent diversity in studies examining GABAergic control of dendritic  $\Delta$ Ca<sup>2+</sup>. Previous work from our lab  
236 showed that inhibition could be highly compartmentalized in layer 2/3 pyramidal neurons, with  
237 neighboring spines exhibiting markedly different amounts of inhibition (Chiu et al., 2013). In contrast, work  
238 from other groups has shown that more broad dendritic inhibition can occur in L5PNs and hippocampal  
239 CA1 pyramidal neurons (Marlin and Carter, 2014; Mullner et al., 2015; Stokes et al., 2014). Differential  
240 expression and recruitment of voltage-gated conductances, such as KA channels, would be expected to  
241 contribute to the heterogeneity of inhibitory function across cell types.

242 Our computational modeling provides additional insight into the biophysical mechanism  
243 underlying the interaction of KA channels and GABAergic inhibition. We found that decreasing the  
244 potassium conductance, rather than increasing the bAP amplitude per se, was necessary to enhance  
245 dendritic Ca<sup>2+</sup> inhibition. This phenomenon is directly due to the broadening of the bAP duration and  
246 subsequent reduction in the integral Ca<sup>2+</sup> current (see Figure 6A). This finding suggests that a major  
247 contributor to the efficacy of GABAergic regulation of action potentials is the relationship between bAP  
248 duration and Ca<sup>2+</sup> current. In addition, our computational modeling suggests that the enhancement of  
249 GABAergic inhibition is a general biophysical feature of channels that broaden action potentials. AP width  
250 has been linked to the coupling of AP into dendrites and dendritic location (Golding et al., 2001; Stuart et  
251 al., 1997). Furthermore KA channels have been linked to both activity dependent as well as cell type  
252 dependent alteration of action potential repolarization (Kim et al., 2005; Pathak et al., 2016). Our model  
253 and experimental findings together thus predict that dendritic channels that regulate bAP shape are likely



254 to be important factors in altering the dendritic influence of GABAergic synapses, driving cell type- and  
255 subcellular location-dependent differences in the efficacy of GABAergic inhibition.

256 Finally, we found that the voltage-dependent inactivation of KA channels allows for the  
257 enhancement of GABAergic inhibition in the presence of high frequency somatic spike generation. This  
258 suggests that dendritic inhibition may exert greater control over Ca<sup>2+</sup> signaling during periods of high  
259 network activity or somatic depolarization, essentially acting as a source of homeostatic control. These  
260 findings are consistent with previous experimental and computational studies demonstrating the activity-  
261 dependent amplification of trains of bAPs and bAP width in L5PN apical dendrites (Grewe et al., 2010;  
262 Kim et al., 2005; Larkum et al., 1999). Our results suggest that the dynamic properties of active dendritic  
263 conductances such as KA channels enable the alteration of GABAergic inhibition over short millisecond  
264 time frames, providing the basis for a context-dependent, flexible role of GABAergic signaling in shaping  
265 biochemical and electrical signaling in dendrites.

266

267

## 268 **Materials and Methods**

### 269 **Slice Preparation**

270 All animal handling was performed in accordance with guidelines approved by the Yale  
271 Institutional Animal Care and Use Committee and federal guidelines. For GABA uncaging experiments,  
272 subjects were male wild-type C57-BL6 mice, ages P30-40 (Harlan). For optogenetic experiments,  
273 subjects were male and female SOM-Cre mice, ages P30-40 (IMSR Cat# JAX:013044,  
274 RRID:IMSR\_JAX:013044). Under isoflurane anesthesia, mice were decapitated and coronal slices (300  
275  $\mu$ m thick) containing primary visual cortex were cut in ice cold external solution containing (in mM): 110  
276 choline, 25 NaHCO<sub>3</sub>, 1.25 NaH<sub>2</sub>PO<sub>4</sub>, 2.5 KCl, 7 MgCl<sub>2</sub>, 0.5 CaCl<sub>2</sub>, 20 glucose, 11.6 sodium ascorbate,  
277 and 3.1 sodium pyruvate, bubbled with 95% O<sub>2</sub> and 5% CO<sub>2</sub>. After an incubation period of 20 minutes at  
278 34°C, slices were transferred to artificial cerebrospinal fluid (ACSF) containing in (mM): 127 NaCl, 25  
279 NaHCO<sub>3</sub>, 1.25 NaH<sub>2</sub>PO<sub>4</sub>, 2.5 KCl, 1 MgCl<sub>2</sub>, 2 CaCl<sub>2</sub>, and 20 glucose bubbled with 95% O<sub>2</sub> and 5%  
280 CO<sub>2</sub> and maintained at room temperature (20-22°C) for at least 20 min until use.

281

### 282 **Electrophysiology and imaging**

283 Experiments were conducted at room temperature in a submersion type recording chamber.  
284 Whole-cell patch clamp recordings were obtained from layer 5 pyramidal neurons (500  $\mu$ m to 600  $\mu$ m  
285 from the pial surface) identified with video infrared-differential interference contrast. For current-clamp  
286 recordings, glass electrodes (2-4 M $\Omega$  tip resistance) were filled with internal solution containing (in mM):  
287 135 KMeSO<sub>3</sub>, 10 HEPES, 4 MgCl<sub>2</sub>, 4 Na<sub>2</sub>ATP, 0.5 NaGTP, and 10 sodium creatine phosphate,  
288 adjusted to pH 7.3 with KOH. For Ca<sup>2+</sup> imaging experiments, red fluorescent Alexa Fluor-568 (40  $\mu$ M)  
289 and green fluorescent Ca<sup>2+</sup>-sensitive Fluo-5F (300  $\mu$ M) were included in the pipette solution to visualize  
290 cell morphology and changes of intracellular Ca<sup>2+</sup> concentration, respectively. In experiments where only

291 somatic IPSPs or outside-out patches were recorded, Alexa Fluor-568 (40  $\mu\text{M}$ ) and EGTA (100  $\mu\text{M}$ ) were  
292 included in the internal solution. Electrophysiological recordings were made using a Multiclamp 700B  
293 amplifier (Molecular Devices), filtered at 4 kHz, and digitized at 10 kHz. For all recordings, membrane  
294 potential was adjusted to -64 mV using current injection through the pipette. Steady state somatic chord  
295 input resistance was determined by linearly fitting the amplitude of response to 600 ms current injections  
296 of -300, -200, and -100 pA.

297 Outside-out macropatch data was obtained in voltage clamp configuration. Patches were formed  
298 after whole-cell configuration was obtained by withdrawing the pipet without additional suction. Holding  
299 potential was maintained at -75 mV. After a 1 s voltage step to -90 mV, voltage dependent membrane  
300 currents were recorded in response to a 500 ms voltage step to +35 mV. Passive leak was removed  
301 using a P/N subtraction method of the response from -110 mV to -140 mV. A-type currents were  
302 quantified over a 50 ms window beginning 5 ms after the depolarizing voltage step to avoid stimulus  
303 artifact.

304 Two-photon imaging was performed with a custom-modified Olympus BX51-WI microscope,  
305 including components manufactured by Mike's Machine Company. Fluorophores were excited using 840  
306 nm light from a pulsed titanium-sapphire laser. Emissions were separated using appropriate optical filters  
307 (Chroma, Semrock) and collected by photomultiplier tubes (Hamamatsu). A mechanical shutter was  
308 placed in front of the collectors to prevent damage during blue light stimulation. For  $\text{Ca}^{2+}$  imaging, signals  
309 were collected during a 500 Hz line scan across a spine and neighboring dendritic shaft on the main  
310 apical trunk 100  $\mu\text{m}$  to 150  $\mu\text{m}$  from the cell body. Back-propagating action potentials (bAPs) were  
311 evoked using a brief depolarizing current pulse (0.5 ms, 1.5-2.5 nA) through the recording pipette. Trials  
312 including bAP alone, IPSP-bAP, and IPSP alone were interleaved with a 45 second inter-trial interval. In a  
313 subset of experiments, trains of action potentials at 50 Hz and 100 Hz were elicited by current pulse  
314 injections through the recording pipette, ending 20 ms prior to a single current pulse. In this case, trials  
315 including single bAP alone, train-bAP alone, IPSP-bAP, train-IPSP-bAP, IPSP alone, train-IPSP, and train  
316 alone were interleaved with a 45 ms inter-trial interval. Fluorescent traces were computed for individual  
317 cells as the average of 10 trials.

318 Reference frame scans were taken between each acquisition to correct for small spatial drift over  
319 time.  $\text{Ca}^{2+}$  signals were first quantified as changes in green fluorescence from baseline normalized to the  
320 average red fluorescence ( $\Delta\text{G}/\text{R}$ ). To permit comparison of the imaging data across various microscope  
321 configurations, we expressed fluorescence changes as the fraction of the G/R ratio measured in  
322 saturating  $\text{Ca}^{2+}$  ( $\Delta\text{G}/\text{Gsat}$ ).

323

### 324 **Data acquisition and analysis**

325 Imaging and physiology data were acquired using custom software written in MATLAB. Off-line  
326 analysis was performed using custom routines written in MATLAB (MATLAB, RRID:SCR\_001622) and  
327 IgorPro (Wavemetrics Software, RRID:SCR\_000325).  $\text{Ca}^{2+}$  responses were calculated as the integral of

328 the fluorescence transient over the first 100 ms after bAP initiation. In order to enable comparisons across  
329 cells,  $\text{Ca}^{2+}$  inhibition was expressed as in previous studies (Chiu et al., 2013) as  $(\Delta\text{Ca}^{2+}_{\text{ctl}} -$   
330  $\Delta\text{Ca}^{2+}_{\text{inh}})/\Delta\text{Ca}^{2+}_{\text{ctl}}$ . IPSPs were computed as the average of 10 trials, and amplitudes were calculated by  
331 finding the peak of the voltage trace and averaging values across a surrounding 3 ms window. IPSP  
332 decay kinetics were calculated by fitting an exponential to the falling phase of the IPSP. All statistical  
333 comparisons were made using the non-parametric Wilcoxon matched pairs signed rank test in GraphPad  
334 Prism version 7.01 (GraphPad Prism, RRID:SCR\_002798) unless otherwise noted.

335

### 336 **Pharmacology**

337 For all GABA uncaging experiments, ACSF included 3  $\mu\text{M}$  CGP-55845 hydrochloride (Tocris Cat.  
338 No. 1248) to block GABAB receptors, 10  $\mu\text{M}$  (R)-CPP (Tocris Cat. No. 0247) to block NMDA receptors,  
339 and 10  $\mu\text{M}$  NBQX disodium salt (Tocris Cat. No. 1044) to block AMPA receptors. For a subset of  
340 experiments, the ACSF included 5 mM 4-aminopyridine (Tocris Cat. No. 0940), 200 nM AmmTx3  
341 (Smartox Biotechnology), or 100  $\mu\text{M}$  picrotoxin (Tocris Cat. No. 1128). Outside-out potassium currents  
342 were recorded in the presence of 1  $\mu\text{M}$  tetrodotoxin (Tocris Ca. No. 1078). Local application of 25 mM 4-  
343 AP was achieved using a glass puffer pipette ( $< 2 \mu\text{m}$  tip) coupled to a Picospritzer. Drugs were ejected  
344 continuously with 10-17 psi, and pipettes were positioned 30-70  $\mu\text{m}$  from the targeted structure at the  
345 surface of the slice. In experiments where one-photon uncaging was performed with local drug  
346 application, 10.8  $\mu\text{M}$  RuBi-GABA was included in the puffer pipette. In a subset of cells, somatic current  
347 injections elicited bursts of action potentials in the presence of 4-AP and were excluded from subsequent  
348 analysis.

349 Visible light-evoked GABA uncaging was accomplished using RuBi-GABA (10.8  $\mu\text{M}$ ) bath-  
350 applied in the ACSF (Rial Verde et al., 2008). We overfilled the back aperture of the microscope objective  
351 (60x, 1.0 NA) with collimated blue light from a fiber-coupled 473 nm laser. Spherical aberrations due to  
352 fiber-coupling resulted in a 15-20  $\mu\text{m}$  diameter disc of light at the focal plane centered on the field of view.  
353 A brief (0.5 ms) pulse of light (1-2 mW at the sample) reliably evoked uncaging-evoked IPSPs. For  $\text{Ca}^{2+}$   
354 imaging experiments, a blue light photo-artifact was corrected by subtracting fluorescence traces on  
355 uncaging-alone trials from those with  $\text{Ca}^{2+}$  imaging. For all experiments, GABA uncaging occurred 15 ms  
356 prior to bAP initiation.

357

### 358 **ChR2 Expression and Activation**

359 To stimulate SOM-INs, SOM-Cre mice were injected 13-23 days prior to slice preparation into the  
360 primary visual cortex with recombinant adeno-associated virus (AAV) driving conditional expression of a  
361 ChR2-eYFP fusion protein under the Ef1a-promoter (AAV-DIO-Ef1a-ChR2-EYFP)(UNC Vector Core).  
362 Optogenetic stimulation was accomplished using the same light source and path as one-photon GABA  
363 uncaging (see above). Brief (2-3 mW, 0.5 ms) pulses were used to stimulate SOM-INs 15 ms prior to bAP  
364 initiation.

365

## 366 **NEURON Modeling**

367 Multi-compartment time-dependent simulations were run using NEURON v7.4 (NEURON,  
368 RRID:SCR\_005393, available free at <http://neuron.med.yale.edu>) and analyzed using custom scripts  
369 written in Jupyter Notebooks 4.1.0 using Python 3.5.2. We modified a previously published ball and stick  
370 model (Chiu et al., 2013) adding compartments for a basal dendrite and two apical tuft dendrites. A single  
371 dendritic spine (1  $\mu\text{m}$  diameter) was attached to the apical dendrite 122.5  $\mu\text{m}$  from the cell body by a neck  
372 (1  $\mu\text{m}$  length, 0.07  $\mu\text{m}$  diameter). A medium voltage-gated calcium channel was inserted into the dendritic  
373 spine and neighboring dendrite such that currents through these channels would minimally impact  
374 membrane potential (Almog and Korngreen, 2014). GABAergic synapses were modeled as an  
375 exponential synapse contacting the dendritic shaft located 123.5  $\mu\text{m}$  from the cell body. We modeled KA  
376 currents using a previously published channel definition that fits observed A-type potassium currents in  
377 distal dendrites and altered the expression pattern of this channel and sodium currents in the apical  
378 dendrite (Acker and Antic, 2009; Migliore et al., 1999). In order to reproduce our experimental conditions,  
379 an iterative search was conducted to find a somatic current injection that maintained the somatic resting  
380 potential at 64.00 +/- 0.0001 mV at the cell body for each condition tested. Similar to our experiments we  
381 quantified calcium flux over a 100 ms window in order to calculate percent calcium change due to  
382 inhibition. To speed up simulation time, simulations were run in parallel using the built-in message  
383 passing interface of NEURON.

384

385

## 386 **Acknowledgements**

387 The authors thank Drs. Jess Cardin, Susumu Tomita, and Michael Crair as well as members of the Higley  
388 lab for constructive comments during the preparation of this manuscript. Experiments were supported by  
389 funding from the March of Dimes (Basil O'Connor Award) and the NIH (R01 MH099045, T32 EY22312).

390

391

## 392 References

393

- 394 Acker, C.D., and Antic, S.D. (2009). Quantitative assessment of the distributions of membrane  
395 conductances involved in action potential backpropagation along basal dendrites. *J Neurophysiol*  
396 *101*, 1524-1541. doi:10.1152/jn.00651.2007
- 397 Almog, M., and Korngreen, A. (2014). A quantitative description of dendritic conductances and its  
398 application to dendritic excitation in layer 5 pyramidal neurons. *J Neurosci* *34*, 182-196.  
399 doi:10.1523/JNEUROSCI.2896-13.2014
- 400 Beaulieu, C., and Somogyi, P. (1990). Targets and Quantitative Distribution of GABAergic Synapses in  
401 the Visual Cortex of the Cat. *Eur J Neurosci* *2*, 896. doi:10.1111/j.1460-9568.1990.tb00421.x
- 402 Bekkers, J.M. (2000). Distribution and activation of voltage-gated potassium channels in cell-attached and  
403 outside-out patches from large layer 5 cortical pyramidal neurons of the rat. *J Physiol* *525 Pt 3*, 611-  
404 620. doi:10.1111/j.1469-7793.2000.t01-2-00611.x
- 405 Bloss, E.B., Cembrowski, M.S., Karsh, B., Colonell, J., Fetter, R.D., and Spruston, N. (2016). Structured  
406 Dendritic Inhibition Supports Branch-Selective Integration in CA1 Pyramidal Cells. *Neuron* *89*, 1016-  
407 1030. doi:10.1016/j.neuron.2016.01.029
- 408 Brager, D.H., and Johnston, D. (2014). Channelopathies and dendritic dysfunction in fragile X syndrome.  
409 *Brain Res Bull* *103*, 11-17. doi:10.1016/j.brainresbull.2014.01.002
- 410 Burkhalter, A., Gonchar, Y., Mellor, R.L., and Nerbonne, J.M. (2006). Differential expression of I(A)  
411 channel subunits Kv4.2 and Kv4.3 in mouse visual cortical neurons and synapses. *J Neurosci* *26*,  
412 12274-12282. doi:10.1523/JNEUROSCI.2599-06.2006
- 413 Cai, X., Liang, C.W., Muralidharan, S., Kao, J.P., Tang, C.M., and Thompson, S.M. (2004). Unique roles  
414 of SK and Kv4.2 potassium channels in dendritic integration. *Neuron* *44*, 351-364.  
415 doi:10.1016/j.neuron.2004.09.026
- 416 Canepari, M., Djuricic, M., and Zecevic, D. (2007). Dendritic signals from rat hippocampal CA1 pyramidal  
417 neurons during coincident pre- and post-synaptic activity: a combined voltage- and calcium-imaging  
418 study. *J Physiol* *580*, 463-484. doi:10.1113/jphysiol.2006.125005
- 419 Carrasquillo, Y., Burkhalter, A., and Nerbonne, J.M. (2012). A-type K<sup>+</sup> channels encoded by Kv4.2, Kv4.3  
420 and Kv1.4 differentially regulate intrinsic excitability of cortical pyramidal neurons. *J Physiol* *590*,  
421 3877-3890. doi:10.1113/jphysiol.2012.229013
- 422 Chalifoux, J.R., and Carter, A.G. (2011). GABAB receptor modulation of voltage-sensitive calcium  
423 channels in spines and dendrites. *J Neurosci* *31*, 4221-4232. doi:10.1523/JNEUROSCI.4561-10.2011
- 424 Chiu, C.Q., Lur, G., Morse, T.M., Carnevale, N.T., Ellis-Davies, G.C., and Higley, M.J. (2013).  
425 Compartmentalization of GABAergic inhibition by dendritic spines. *Science* *340*, 759-762.  
426 doi:10.1126/science.1234274
- 427 Cichon, J., and Gan, W.B. (2015). Branch-specific dendritic Ca<sup>2+</sup> spikes cause persistent synaptic  
428 plasticity. *Nature* *520*, 180-185. doi:10.1038/nature14251
- 429 Clark, B.D., Kwon, E., Maffie, J., Jeong, H.Y., Nadal, M., Strop, P., and Rudy, B. (2008). DPP6  
430 Localization in Brain Supports Function as a Kv4 Channel Associated Protein. *Front Mol Neurosci* *1*,  
431 8. doi:10.3389/neuro.02.008.2008
- 432 Cook, E.P., and Johnston, D. (1999). Voltage-dependent properties of dendrites that eliminate location-  
433 dependent variability of synaptic input. *J Neurophysiol* *81*, 535-543.
- 434 Foeger, N.C., Norris, A.J., Wren, L.M., and Nerbonne, J.M. (2012). Augmentation of Kv4.2-encoded  
435 currents by accessory dipeptidyl peptidase 6 and 10 subunits reflects selective cell surface Kv4.2  
436 protein stabilization. *J Biol Chem* *287*, 9640-9650. doi:10.1074/jbc.M111.324574
- 437 Frick, A., Magee, J., Koester, H.J., Migliore, M., and Johnston, D. (2003). Normalization of Ca<sup>2+</sup> signals  
438 by small oblique dendrites of CA1 pyramidal neurons. *J Neurosci* *23*, 3243-3250.
- 439 Fukumoto, N., Kitamura, N., Niimi, K., Takahashi, E., Itakura, C., and Shibuya, I. (2012). Ca<sup>2+</sup> channel  
440 currents in dorsal root ganglion neurons of P/Q-type voltage-gated Ca<sup>2+</sup> channel mutant mouse,  
441 rolling mouse Nagoya. *Neurosci Res* *73*, 199-206. doi:10.1016/j.neures.2012.04.006
- 442 Gasparini, S. (2011). Distance- and activity-dependent modulation of spike back-propagation in layer V  
443 pyramidal neurons of the medial entorhinal cortex. *J Neurophysiol* *105*, 1372-1379.  
444 doi:10.1152/jn.00014.2010
- 445 Golding, N.L., Kath, W.L., and Spruston, N. (2001). Dichotomy of action-potential backpropagation in CA1  
446 pyramidal neuron dendrites. *J Neurophysiol* *86*, 2998-3010.

- 447 Grewe, B.F., Bonnan, A., and Frick, A. (2010). Back-Propagation of Physiological Action Potential Output  
448 in Dendrites of Slender-Tufted L5A Pyramidal Neurons. *Front Cell Neurosci* 4, 13.  
449 doi:10.3389/fncel.2010.00013
- 450 Gross, C., Yao, X., Pong, D.L., Jeromin, A., and Bassell, G.J. (2011). Fragile X mental retardation protein  
451 regulates protein expression and mRNA translation of the potassium channel Kv4.2. *J Neurosci* 31,  
452 5693-5698. doi:10.1523/JNEUROSCI.6661-10.2011
- 453 Harnett, M.T., Xu, N.L., Magee, J.C., and Williams, S.R. (2013). Potassium channels control the  
454 interaction between active dendritic integration compartments in layer 5 cortical pyramidal neurons.  
455 *Neuron* 79, 516-529. doi:10.1016/j.neuron.2013.06.005
- 456 Hayama, T., Noguchi, J., Watanabe, S., Takahashi, N., Hayashi-Takagi, A., Ellis-Davies, G.C., Matsuzaki,  
457 M., and Kasai, H. (2013). GABA promotes the competitive selection of dendritic spines by controlling  
458 local Ca<sup>2+</sup> signaling. *Nat Neurosci* 16, 1409-1416. doi:10.1038/nn.3496
- 459 Higley, M.J., and Contreras, D. (2006). Balanced excitation and inhibition determine spike timing during  
460 frequency adaptation. *J Neurosci* 26, 448-457. doi:10.1523/JNEUROSCI.3506-05.2006
- 461 Hoffman, D.A., Magee, J.C., Colbert, C.M., and Johnston, D. (1997). K<sup>+</sup> channel regulation of signal  
462 propagation in dendrites of hippocampal pyramidal neurons. *Nature* 387, 869-875. doi:10.1038/43119
- 463 Jinno, S., Jeromin, A., and Kosaka, T. (2005). Postsynaptic and extrasynaptic localization of Kv4.2  
464 channels in the mouse hippocampal region, with special reference to targeted clustering at gabaergic  
465 synapses. *Neuroscience* 134, 483-494. doi:10.1016/j.neuroscience.2005.04.065
- 466 Johnston, D., and Narayanan, R. (2008). Active dendrites: colorful wings of the mysterious butterflies.  
467 *Trends Neurosci* 31, 309-316. doi:10.1016/j.tins.2008.03.004
- 468 Kalmbach, B.E., Johnston, D., and Brager, D.H. (2015). Cell-Type Specific Channelopathies in the  
469 Prefrontal Cortex of the *fmr1*-y Mouse Model of Fragile X Syndrome. *eNeuro* 2.  
470 doi:10.1523/ENEURO.0114-15.2015
- 471 Kameyama, M., Kameyama, A., Kaibara, M., Nakayama, T., and Irisawa, H. (1989). Intracellular  
472 mechanisms involved in "run-down" of calcium channels. *Adv Exp Med Biol* 255, 111-117.
- 473 Kanemoto, Y., Matsuzaki, M., Morita, S., Hayama, T., Noguchi, J., Senda, N., Momotake, A., Arai, T., and  
474 Kasai, H. (2011). Spatial distributions of GABA receptors and local inhibition of Ca<sup>2+</sup> transients  
475 studied with GABA uncaging in the dendrites of CA1 pyramidal neurons. *PLoS One* 6, e22652.  
476 doi:10.1371/journal.pone.0022652
- 477 Kim, J., Jung, S.C., Clemens, A.M., Petralia, R.S., and Hoffman, D.A. (2007). Regulation of dendritic  
478 excitability by activity-dependent trafficking of the A-type K<sup>+</sup> channel subunit Kv4.2 in hippocampal  
479 neurons. *Neuron* 54, 933-947. doi:10.1016/j.neuron.2007.05.026
- 480 Kim, J., Wei, D.S., and Hoffman, D.A. (2005). Kv4 potassium channel subunits control action potential  
481 repolarization and frequency-dependent broadening in rat hippocampal CA1 pyramidal neurones. *J*  
482 *Physiol* 569, 41-57. doi:10.1113/jphysiol.2005.095042
- 483 Korngreen, A., and Sakmann, B. (2000). Voltage-gated K<sup>+</sup> channels in layer 5 neocortical pyramidal  
484 neurones from young rats: subtypes and gradients. *J Physiol* 525 Pt 3, 621-639. doi:10.1111/j.1469-  
485 7793.2000.00621.x
- 486 Larkum, M.E., Zhu, J.J., and Sakmann, B. (1999). A new cellular mechanism for coupling inputs arriving  
487 at different cortical layers. *Nature* 398, 338-341. doi:10.1038/18686
- 488 Losonczy, A., Makara, J.K., and Magee, J.C. (2008). Compartmentalized dendritic plasticity and input  
489 feature storage in neurons. *Nature* 452, 436-441. doi:10.1038/nature06725
- 490 Lovett-Barron, M., Turi, G.F., Kaifosh, P., Lee, P.H., Bolze, F., Sun, X.H., Nicoud, J.F., Zemelman, B.V.,  
491 Sternson, S.M., and Losonczy, A. (2012). Regulation of neuronal input transformations by tunable  
492 dendritic inhibition. *Nat Neurosci* 15, 423-430, S421-423. doi:10.1038/nn.3024
- 493 Maffie, J.K., Dvoretzkova, E., Bougis, P.E., Martin-Eauclaire, M.F., and Rudy, B. (2013). Dipeptidyl-  
494 peptidase-like-proteins confer high sensitivity to the scorpion toxin AmmTX3 to Kv4-mediated A-type  
495 K<sup>+</sup> channels. *J Physiol* 591, 2419-2427. doi:10.1113/jphysiol.2012.248831
- 496 Magee, J.C., and Carruth, M. (1999). Dendritic voltage-gated ion channels regulate the action potential  
497 firing mode of hippocampal CA1 pyramidal neurons. *J Neurophysiol* 82, 1895-1901.
- 498 Magee, J.C., and Johnston, D. (1997). A synaptically controlled, associative signal for Hebbian plasticity  
499 in hippocampal neurons. *Science* 275, 209-213. doi:10.1126/science.275.5297.209
- 500 Markram, H., Lubke, J., Frotscher, M., and Sakmann, B. (1997). Regulation of synaptic efficacy by  
501 coincidence of postsynaptic APs and EPSPs. *Science* 275, 213-215.  
502 doi:10.1126/science.275.5297.213

- 503 Marlin, J.J., and Carter, A.G. (2014). GABA-A receptor inhibition of local calcium signaling in spines and  
504 dendrites. *J Neurosci* 34, 15898-15911. doi:10.1523/JNEUROSCI.0869-13.2014
- 505 Migliore, M., Hoffman, D.A., Magee, J.C., and Johnston, D. (1999). Role of an A-type K<sup>+</sup> conductance in  
506 the back-propagation of action potentials in the dendrites of hippocampal pyramidal neurons. *J*  
507 *Comput Neurosci* 7, 5-15.
- 508 Miles, R., Tóth, K., Gulyás, A.I., Hájos, N., and Freund, T.F. (1996). Differences between Somatic and  
509 Dendritic Inhibition in the Hippocampus. *Neuron* 16, 815-823. doi:10.1016/S0896-6273(00)80101-4
- 510 Miller, J.P., Rall, W., and Rinzel, J. (1985). Synaptic amplification by active membrane in dendritic spines.  
511 *Brain Res* 325, 325-330. doi:10.1016/0006-8993(85)90333-6
- 512 Mullner, F.E., Wierenga, C.J., and Bonhoeffer, T. (2015). Precision of Inhibition: Dendritic Inhibition by  
513 Individual GABAergic Synapses on Hippocampal Pyramidal Cells Is Confined in Space and Time.  
514 *Neuron* 87, 576-589. doi:10.1016/j.neuron.2015.07.003
- 515 Paille, V., Fino, E., Du, K., Morera-Herreras, T., Perez, S., Kotaleski, J.H., and Venance, L. (2013).  
516 GABAergic circuits control spike-timing-dependent plasticity. *J Neurosci* 33, 9353-9363.  
517 doi:10.1523/JNEUROSCI.5796-12.2013
- 518 Palmer, L., Murayama, M., and Larkum, M. (2012). Inhibitory Regulation of Dendritic Activity in vivo. *Front*  
519 *Neural Circuits* 6, 26. doi:10.3389/fncir.2012.00026
- 520 Pathak, D., Guan, D., and Foehring, R.C. (2016). Roles of specific Kv channel types in repolarization of  
521 the action potential in genetically identified subclasses of pyramidal neurons in mouse neocortex. *J*  
522 *Neurophysiol* 115, 2317-2329. doi:10.1152/jn.01028.2015
- 523 Poirazi, P., and Mel, B.W. (2001). Impact of active dendrites and structural plasticity on the memory  
524 capacity of neural tissue. *Neuron* 29, 779-796. doi:10.1016/S0896-6273(01)00252-5
- 525 Pouille, F., and Scanziani, M. (2001). Enforcement of temporal fidelity in pyramidal cells by somatic feed-  
526 forward inhibition. *Science* 293, 1159-1163. doi:10.1126/science.1060342
- 527 Ramakers, G.M., and Storm, J.F. (2002). A postsynaptic transient K<sup>(+)</sup> current modulated by arachidonic  
528 acid regulates synaptic integration and threshold for LTP induction in hippocampal pyramidal cells.  
529 *Proc Natl Acad Sci U S A* 99, 10144-10149. doi:10.1073/pnas.152620399
- 530 Rial Verde, E.M., Zayat, L., Eichenique, R., and Yuste, R. (2008). Photorelease of GABA with Visible  
531 Light Using an Inorganic Caging Group. *Front Neural Circuits* 2, 2. doi:10.3389/neuro.04.002.2008
- 532 Sandler, M., Shulman, Y., and Schiller, J. (2016). A Novel Form of Local Plasticity in Tuft Dendrites of  
533 Neocortical Somatosensory Layer 5 Pyramidal Neurons. *Neuron* 90, 1028-1042.  
534 doi:10.1016/j.neuron.2016.04.032
- 535 Serodio, P., Kentros, C., and Rudy, B. (1994). Identification of molecular components of A-type channels  
536 activating at subthreshold potentials. *J Neurophysiol* 72, 1516-1529.
- 537 Serodio, P., and Rudy, B. (1998). Differential expression of Kv4 K<sup>+</sup> channel subunits mediating  
538 subthreshold transient K<sup>+</sup> (A-type) currents in rat brain. *J Neurophysiol* 79, 1081-1091.
- 539 Shepherd, G.M., Brayton, R.K., Miller, J.P., Segev, I., Rinzel, J., and Rall, W. (1985). Signal  
540 enhancement in distal cortical dendrites by means of interactions between active dendritic spines.  
541 *Proc Natl Acad Sci U S A* 82, 2192-2195.
- 542 Stokes, C.C., Teeter, C.M., and Isaacson, J.S. (2014). Single dendrite-targeting interneurons generate  
543 branch-specific inhibition. *Front Neural Circuits* 8, 139. doi:10.3389/fncir.2014.00139
- 544 Stuart, G., Schiller, J., and Sakmann, B. (1997). Action potential initiation and propagation in rat  
545 neocortical pyramidal neurons. *J Physiol* 505 ( Pt 3), 617-632.
- 546 Tsubokawa, H., and Ross, W.N. (1996). IPSPs modulate spike backpropagation and associated [Ca<sup>2+</sup>]<sub>i</sub>  
547 changes in the dendrites of hippocampal CA1 pyramidal neurons. *J Neurophysiol* 76, 2896-2906.
- 548 Wehr, M., and Zador, A.M. (2003). Balanced inhibition underlies tuning and sharpens spike timing in  
549 auditory cortex. *Nature* 426, 442-446. doi:10.1038/nature02116
- 550 Wilmes, K.A., Sprekeler, H., and Schreiber, S. (2016). Inhibition as a Binary Switch for Excitatory  
551 Plasticity in Pyramidal Neurons. *PLoS Comput Biol* 12, e1004768. doi:10.1371/journal.pcbi.1004768
- 552 Yuste, R. (1997). Potassium channels. Dendritic shock absorbers. *Nature* 387, 851, 853.  
553 doi:10.1038/43063
- 554 Zhu, Y., Stornetta, R.L., and Zhu, J.J. (2004). Chandelier cells control excessive cortical excitation:  
555 characteristics of whisker-evoked synaptic responses of layer 2/3 nonpyramidal and pyramidal  
556 neurons. *J Neurosci* 24, 5101-5108. doi:10.1523/JNEUROSCI.0544-04.2004

557

558

559

560



561 **Figure Legends**

562

563 **Figure 1. GABAergic inhibition of  $\Delta\text{Ca}^{2+}$  is enhanced by blockade of KA channels.**

564 (A) Whole Cell patch recording where performed in L5PNs of visual cortex.  $\text{Ca}^{2+}$  imaging and GABA  
565 uncaging were performed along the proximal apical dendrite, as shown in the example cell (A1) and  
566 schematic (A2). Scale bar 25  $\mu\text{m}$ . (B) Example spine-dendrite pair and the associated line-scanned  
567 response to a bAP. (C) Average  $\pm$  SEM somatic voltage recorded before (black) and after (green)  
568 treatment with 4-AP for action potentials (upper traces) and uncaging-evoked IPSPs. (D) Example bAP-  
569 evoked  $\Delta\text{Ca}^{2+}$  for the apical dendritic region shown in (B) for bAP alone (black, blue) or paired with  
570 GABA uncaging (red, orange) for the spine and neighboring dendrite, before (left) and after (right)  
571 treatment with 5 mM 4-AP. (E) Average ( $n=10$ )  $\Delta\text{Ca}^{2+}$  for the population of imaged spines and dendrites,  
572 colors as in (D). (F-G) Population data ( $n=10$ ) showing the magnitude of  $\Delta\text{Ca}^{2+}$  inhibition and peak bAP-  
573 evoked  $\Delta\text{Ca}^{2+}$  for spines (F) and neighboring dendrites (G) before (black) and after (green) treatment  
574 with 5 mM 4-AP (Wilcoxon matched-pairs signed rank test,  $*p<0.05$ ).

575

576 **Figure 1 — figure supplement 1. Picrotoxin blocks the effects of GABA uncaging.**

577 **Figure 1 — figure supplement 2. Saline does not alter GABAergic inhibition of  $\Delta\text{Ca}^{2+}$ .**

578 **Figure 1 — figure supplement 3. Somatic IPSPs are enhanced by blockade of KA channels.**

579 **Figure 1 — figure supplement 4. GABAergic inhibition of  $\Delta\text{Ca}^{2+}$  is not enhanced by 4-AP in basal**  
580 **dendrites**

581

582 **Figure 1— figure supplement 1. Picrotoxin blocks the effects of GABA uncaging.**

583 (A) Schematic of recording and imaging configuration. Experiments are performed in the presence of  
584 picrotoxin (100  $\mu\text{M}$ ). (B) Average  $\pm$  SEM ( $n=6$ )  $\text{Ca}^{2+}$  transients in proximal apical dendrites for bAP alone  
585 or paired with GABA uncaging before (left) and after (right) treatment with 4-AP (colors as in Fig. 1). (C-D)  
586 Population data ( $n=6$ ) showing the magnitude of  $\text{Ca}^{2+}$  inhibition and peak bAP-evoked  $\text{Ca}^{2+}$  for spines  
587 (C) and neighboring dendritic shafts (D) in control (black) and 4-AP (green) conditions (Wilcoxon  
588 matched-pairs signed rank test,  $*p<0.05$ ).

589

590 **Figure 1 — figure supplement 2. Saline does not alter GABAergic inhibition of  $\Delta\text{Ca}^{2+}$ .**

591 (A) Schematic of recording and imaging configuration. (B) Average  $\pm$  SEM ( $n=7$ )  $\text{Ca}^{2+}$  transients in  
592 proximal apical dendrites for bAP alone or paired with GABA uncaging before (left) and after (right)  
593 treatment with control saline (colors as in Fig. 1). (C-D) Population data ( $n=7$ ) showing the magnitude of  
594  $\text{Ca}^{2+}$  inhibition and peak bAP-evoked  $\text{Ca}^{2+}$  for spines (C) and neighboring dendritic shafts (D) in control  
595 (black) and saline (green) conditions (Wilcoxon matched-pairs signed rank test,  $*p<0.05$ ).

596

597 **Figure 1 — figure supplement 3. Somatic IPSPs are enhanced by blockade of KA channels.**

598 (A) Schematic of recording configuration. (B) Average  $\pm$  SEM (n=9) IPSPs before (black) and after  
599 (green) treatment with 5 mM 4-AP for single (left) and triple (right) GABA uncaging events. (C) Population  
600 data (n=9) showing peak IPSP amplitude (left) and ratio of third:first amplitude (right) in control (black)  
601 and 4-AP (green) conditions (Wilcoxon matched-pairs signed rank test, \*p<0.05). (D) Population data  
602 (n=9) showing decay time constant for single IPSPs (Wilcoxon matched-pairs signed rank test, \*p<0.05).  
603 (E) Population data (n=9) showing somatic input resistance (Wilcoxon matched-pairs signed rank test,  
604 p>0.05)

605

606 **Figure 1 — figure supplement 4. GABAergic inhibition of  $\Delta\text{Ca}^{2+}$  is not enhanced by 4-AP in basal**  
607 **dendrites**

608 (A) Schematic of recording and imaging configuration. (B) Average  $\pm$  SEM (n=10)  $\text{Ca}^{2+}$  transients in  
609 basal dendrites for bAP alone or paired with GABA uncaging before (left) and after (right) treatment with  
610 4-AP (colors as in Fig. 1). (C-D) Population data (n=10) showing the magnitude of  $\text{Ca}^{2+}$  inhibition and  
611 peak bAP-evoked  $\text{Ca}^{2+}$  for spines (C) and neighboring dendritic shafts (D) in control (black) and 4-AP  
612 (green) conditions (Wilcoxon matched-pairs signed rank test, \*p<0.05).

613

614 **Figure 2. GABAergic inhibition of  $\Delta\text{Ca}^{2+}$  is enhanced by local blockade of KA channels.**

615 (A) Schematic of recording and imaging configuration, illustrating location of puffed 4-AP. (B) Average  $\pm$   
616 SEM (n=7)  $\text{Ca}^{2+}$  transients for bAP alone or paired with GABA uncaging before (left) and after (right)  
617 application of 4-AP to the proximal apical dendrite (colors as in Fig. 1). (C-D) Population data (n=7)  
618 showing the magnitude of  $\text{Ca}^{2+}$  inhibition and peak bAP-evoked  $\text{Ca}^{2+}$  for spines (C) and neighboring  
619 dendritic shafts (D) in control (black) and 4-AP (green) conditions (Wilcoxon matched-pairs signed rank  
620 test, \*p<0.05).

621 **Figure 2 — figure supplement 1. GABAergic inhibition of  $\Delta\text{Ca}^{2+}$  in the proximal apical dendrite is**  
622 **not affected by somatic or distal dendritic KA channel blockade.**

623 **Figure 2 — figure supplement 2. Effect of blockade of potassium channels at proximal apical**  
624 **dendrite and soma on somatic IPSP.**

625

626 **Figure 2 — figure supplement 1. GABAergic inhibition of  $\Delta\text{Ca}^{2+}$  in the proximal apical dendrite is**  
627 **not affected by somatic or distal dendritic KA channel blockade.**

628 (A) Schematic of recording and imaging configuration, illustrating somatic location of puffed 4-AP. (B)  
629 Average  $\pm$  SEM (n=6)  $\text{Ca}^{2+}$  transients for bAP alone or paired with GABA uncaging before (left) and after  
630 (right) application of 4-AP to the soma (colors as in Fig. 1). (C-D) Population data (n=6) showing the  
631 magnitude of  $\text{Ca}^{2+}$  inhibition and peak bAP-evoked  $\text{Ca}^{2+}$  for spines (C) and neighboring dendritic shafts  
632 (D) in control (black) and 4-AP (green) conditions (Wilcoxon matched-pairs signed rank test, p>0.05). (E)  
633 Schematic of experimental configuration, illustrating distal dendritic location of puffed 4-AP. (F) Average  $\pm$   
634 SEM (n=6)  $\text{Ca}^{2+}$  transients for bAP alone of paired with GABA uncaging before (left) and after (right)

635 application of 4-AP to the distal dendrite (colors as in Fig. 1). **(G-H)** Population data (n=6) showing the  
636 magnitude of Ca<sup>2+</sup> inhibition and peak bAP-evoked Ca<sup>2+</sup> for spines (G) and neighboring dendritic shafts  
637 (H) in control (black) and 4-AP (green) conditions (Wilcoxon matched-pairs signed rank test, p>0.05).

638

639 **Figure 2 — figure supplement 2. Effect of blockade of potassium channels at proximal apical**  
640 **dendrite and soma on somatic IPSP**

641 **(A)** Schematic of recording configuration, illustrating dendritic location of puffed 4-AP. **(B)** Average ± SEM  
642 (n=9) IPSPs before (black) and after (green) application of 4-AP to the apical dendrite for single (upper)  
643 and triple (lower) GABA uncaging events. **(C)** Population data (n=9) showing peak IPSP amplitude (left)  
644 and ratio of third:first amplitude (right)(Wilcoxon matched-pairs signed rank test, \*p<0.05). **(D)** Population  
645 data (n=9) showing decay time constant for single IPSPs (Wilcoxon matched-pairs signed rank test,  
646 p<0.05). **(E)** Population data (n=9) showing somatic input resistance (Wilcoxon matched-pairs signed  
647 rank test, p<0.05). **(F-J)** As in (A-E) for local application of 4-AP to the soma (n=9, Wilcoxon matched-  
648 pairs signed rank test, \*p<0.05).

649

650 **Figure 3. GABAergic inhibition of ΔCa<sup>2+</sup> is enhanced by blockade of Kv4 channels using**  
651 **AmmTx3.**

652 **(A)** Schematic showing recording and imaging configuration. **(B)** Average ± SEM (n=10) Ca<sup>2+</sup> transients  
653 for bAP alone or paired with GABA uncaging, before (left) and after (right) treatment with the selective  
654 Kv4 blocker AmmTx3 (200 nM) (colors as in Fig. 1). **(C-D)** Population data (n=10) showing the magnitude  
655 of Ca<sup>2+</sup> inhibition and peak bAP-evoked Ca<sup>2+</sup> for spines (C) and neighboring dendritic shafts (D) in  
656 control (black) and AmmTx3 (green) conditions (Wilcoxon matched-pairs signed rank test, \*p<0.05).

657 **Figure 3 — figure supplement 1. Blockade of Kv4 by AmmTx3 has no effect on somatic IPSP**

658 **Figure 3 — figure supplement 2. Outside-out recordings reveal expression of Kv4 channels.**

659

660 **Figure 3 — figure supplement 1. Blockade of Kv4 by AmmTx3 has no effect on somatic IPSP**

661 **(A)** Schematic of recording configuration. **(B)** Average ± SEM (n=6) IPSPs before (black) and after  
662 (green) treatment with 200 nM AmmTx3 for single (left) and triple (right) GABA uncaging events. **(C)**  
663 Population data (n=6) showing peak IPSP amplitude (left) and ratio of third:first amplitude (right) in control  
664 (black) and AmmTx3 (green) conditions (Wilcoxon matched-pairs signed rank test, \*p<0.05). **(D)**  
665 Population data (n=6) showing decay time constant for single IPSPs (Wilcoxon matched-pairs signed  
666 rank test, p>0.05). **(E)** Population data (n=6) showing somatic input resistance (Wilcoxon matched-pairs  
667 signed rank test, \*p>0.05).

668

669 **Figure 3 — figure supplement 2. Outside-out recordings reveal expression of Kv4 channels.**

670 **(A)** Peak-normalized average ± SEM (n=6) currents evoked in somatic outside-out patches before (black)  
671 and after (green) treatment with 4-AP. **(B)** Peak-normalized average ± SEM (n=6) currents evoked in

672 outside-out patches before (black) and after (green) treatment with AmmTx3. **(C)** Population data (n=6)  
673 showing reduction in current produced by 4-AP or AmmTx3 for the measured intervals marked in  
674 (A)(Wilcoxon matched-pairs signed rank test for single columns, Unpaired t-test for comparison between  
675 treatments, \*p<0.05).

676 **Figure 4. Somatic activity enhances GABAergic inhibition of dendritic  $\Delta\text{Ca}^{2+}$ .**

677 **(A)** Average  $\pm$  SEM (n=10) of somatic recordings for a single action potential (black) or when preceded 20  
678 ms by a 100 Hz train of action potentials (green). Inset shows change in spike waveform. **(B)** Average  $\pm$   
679 SEM (n=10)  $\text{Ca}^{2+}$  transients for bAP alone or paired with GABA uncaging, presented either singly (left) or  
680 following a 100 Hz train of action potentials (right)(colors as in Fig. 1). **(C-D)** Population data (n=10)  
681 showing the magnitude of  $\text{Ca}^{2+}$  inhibition and peak bAP-evoked  $\text{Ca}^{2+}$  for spines (C) and neighboring  
682 dendritic shafts (D), presented either singly (black) or following a 100 Hz train of action potentials  
683 (green)(Wilcoxon matched-pairs signed rank test, \*p<0.05).

684 **Figure 4— figure supplement1. Activity-dependent enhancement of GABAergic inhibition is**  
685 **frequency-dependent and occluded by blockade of KA channels.**

686

687 **Figure 4— figure supplement1. Activity-dependent enhancement of GABAergic inhibition is**  
688 **frequency-dependent and occluded by blockade of KA channels.**

689 **(A)** Average  $\pm$  SEM (n=10) of somatic recordings for a single action potential (black) or when preceded  
690 20 ms by a 50 Hz train of action potentials (green). Inset shows change in spike waveform. **(B)** Average  $\pm$   
691 SEM (n=10)  $\text{Ca}^{2+}$  transients for bAP alone or paired with GABA uncaging, presented either singly (left) or  
692 following a 50 Hz train of action potentials (right)(colors as in Fig. 1). **(C-D)** Population data (n=10)  
693 showing the magnitude of  $\text{Ca}^{2+}$  inhibition and peak bAP-evoked  $\text{Ca}^{2+}$  for spines (C) and neighboring  
694 dendritic shafts (D), presented either single (black) or following a 50 Hz train of action potentials  
695 (green)(Wilcoxon matched-pairs signed rank test, \*p<0.05). **(E)** Average  $\pm$  SEM (n=10) of somatic  
696 recordings for a single action potential (black) or when preceded 20 ms by a 100 Hz train of action  
697 potentials (green), in the presence of 5 mM 4-AP. **(F-H)** As in (B-D) for a 100 Hz preceding train and in  
698 the presence of 5 mM 4-AP (n=10, Wilcoxon matched-pairs signed rank test, \*p<0.05).

699

700 **Figure 5. Somatic activity enhances synaptic GABAergic inhibition of  $\Delta\text{Ca}^{2+}$ .**

701 **(A)** Schematic showing recording and imaging configuration. ChR2 was virally expressed in somatostatin-  
702 containing interneurons (SOM-INs) and activated with blue light pulses. **(B)** Average  $\pm$  SEM (n=10)  $\text{Ca}^{2+}$   
703 transients for bAP alone or paired with optical stimulation of SOM-INs, presented either singly (left) or  
704 following a 100 Hz train of action potentials (right)(colors as in Fig. 1). **(C-D)** Population data (n=10)  
705 showing the magnitude of  $\text{Ca}^{2+}$  inhibition and peak bAP-evoked  $\text{Ca}^{2+}$  for spines (C) and neighboring  
706 dendritic shafts (D), presented either singly (black) or following a 100 Hz train of action potentials  
707 (green)(Wilcoxon matched-pairs signed rank test, \*p<0.05).

708

709 **Figure 6. Computational simulations reveal mechanisms underlying KA-dependent regulation of**  
710 **inhibition.**

711 (A) Simulated Ca<sup>2+</sup> currents under three different conditions (indicated in figure) for bAPs evoked alone  
712 (black) or preceded by GABAergic inhibition (red). Yellow shading indicates integral of inhibited Ca<sup>2+</sup>. (B)  
713 Relationship between sodium reversal potential and either peak membrane potential (left) or Ca<sup>2+</sup>  
714 inhibition (right). For peak V<sub>m</sub> data, values for bAP alone (black), bAP paired with inhibition (red), and  
715 resting V<sub>m</sub> (green) are shown. (C) Relationship between KA conductance and either peak membrane  
716 potential (left) or Ca<sup>2+</sup> inhibition (right). Colors are as in (B). (D) Relationship between peak V<sub>m</sub> and Ca<sup>2+</sup>  
717 inhibition under conditions where either sodium reversal potential (closed circles) or KA conductance  
718 (open circles) was varied. (E) Relationship between action potential duration and Ca<sup>2+</sup> inhibition under  
719 conditions where either sodium reversal potential (closed circles) or KA conductance (open circles) was  
720 varied.

721

722

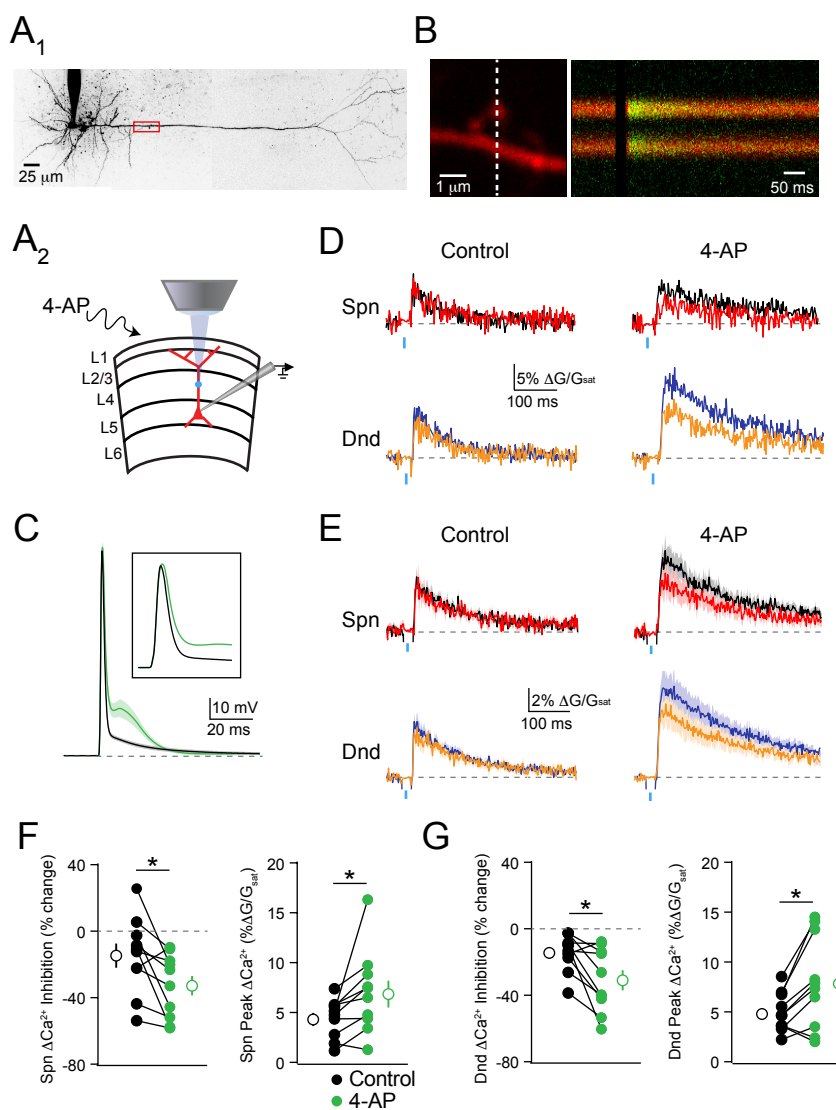

Figure 1

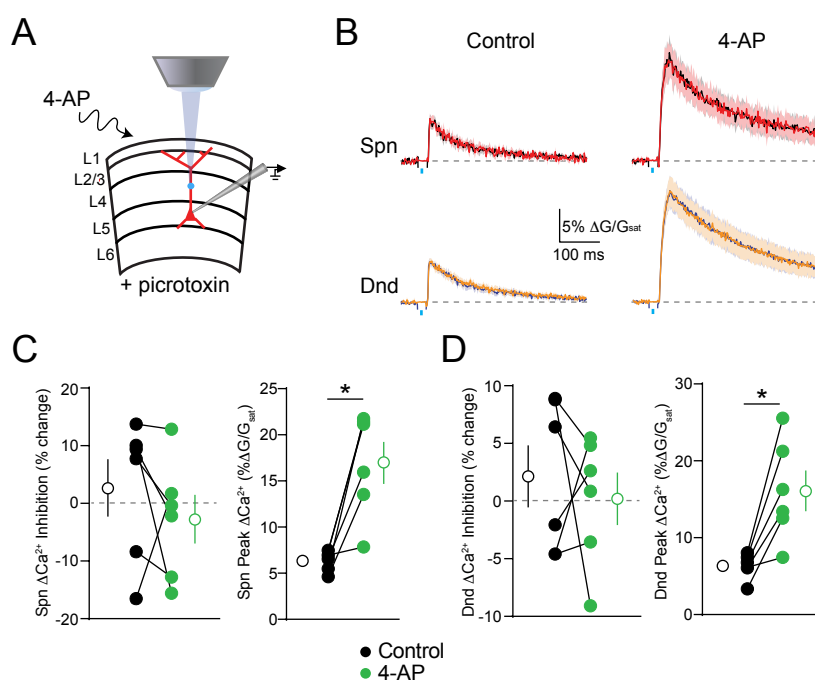

Figure 1 S1

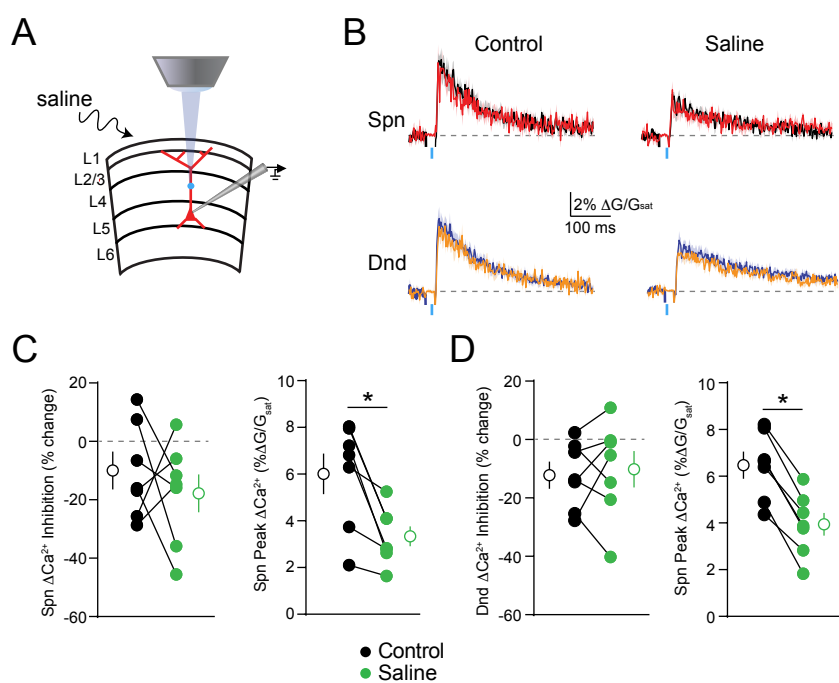



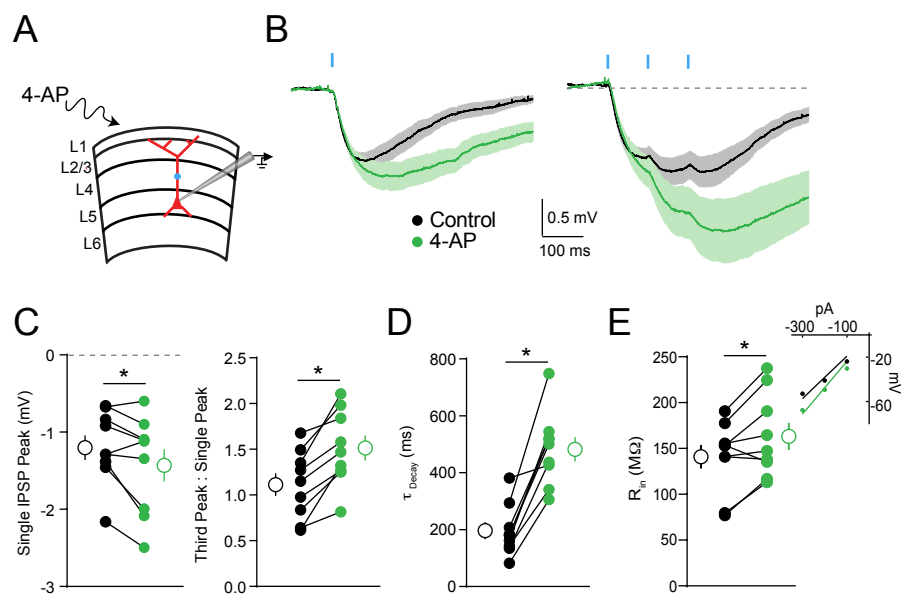

Figure 1 S3

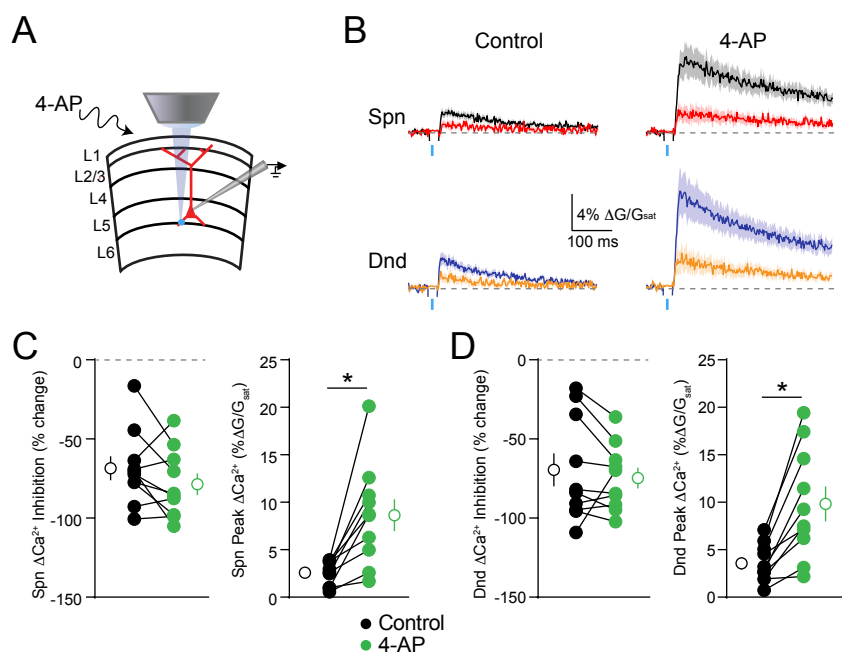

Figure 1 S4

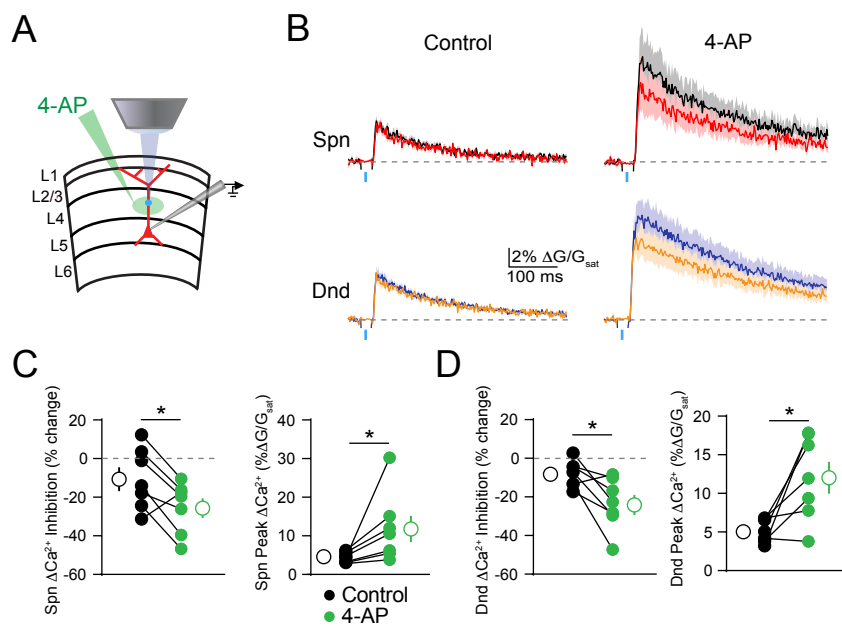

Figure 2

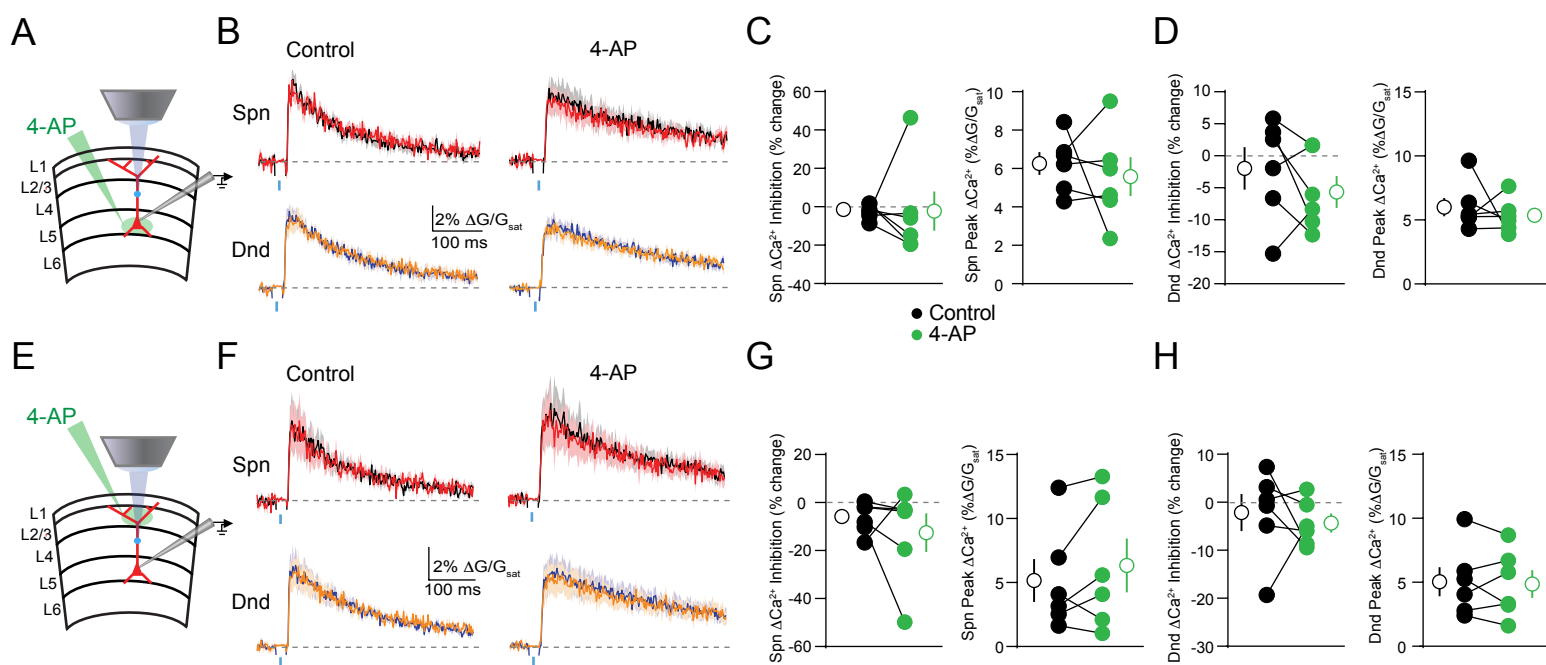

Figure 2 S1

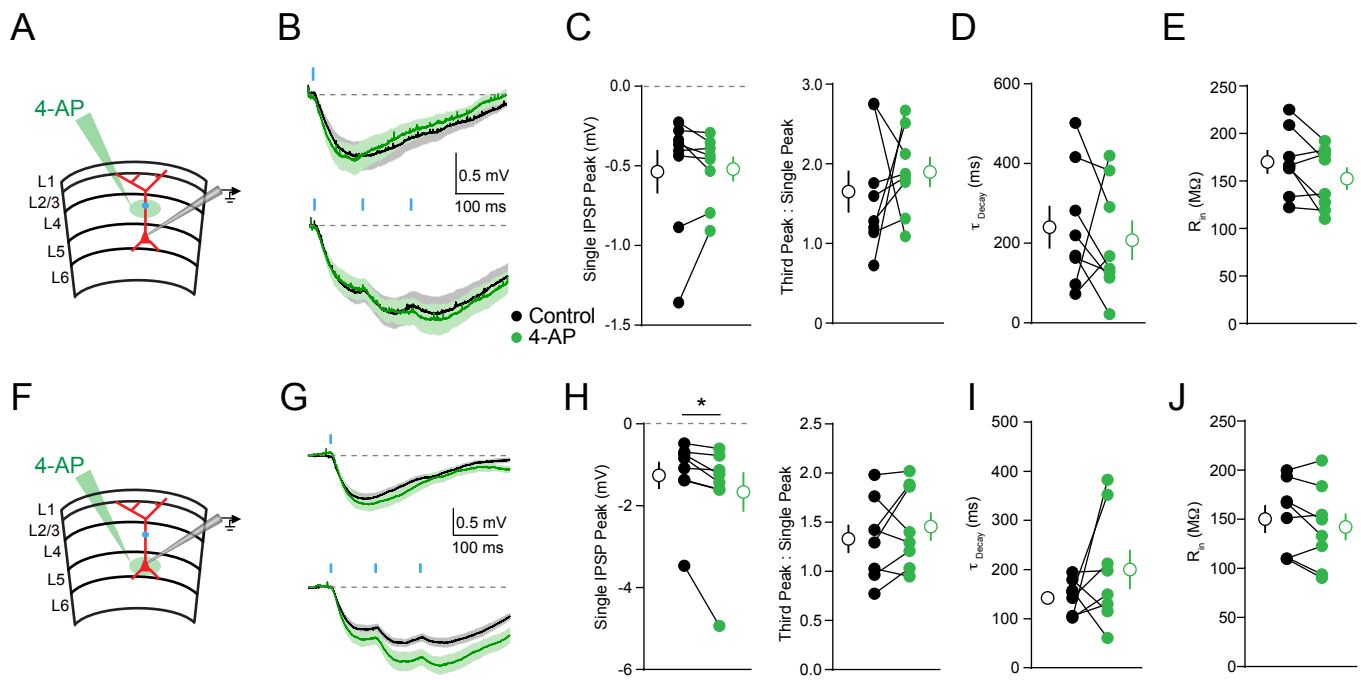

Figure 2 S2

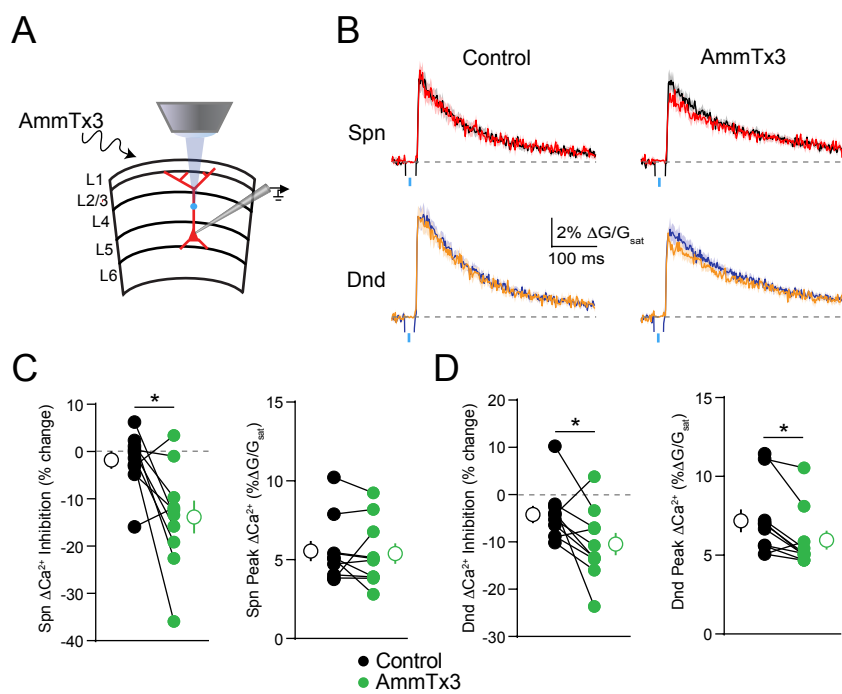

Figure 3

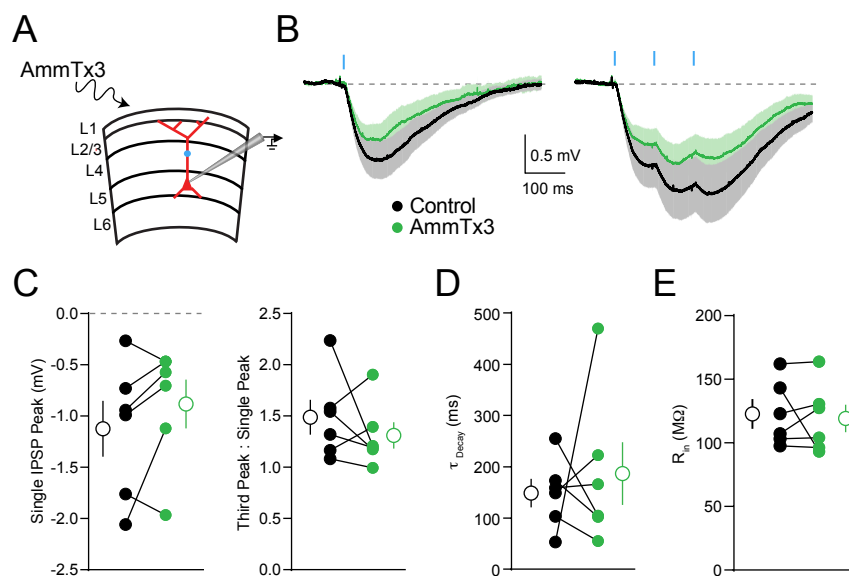

Figure 3 S1

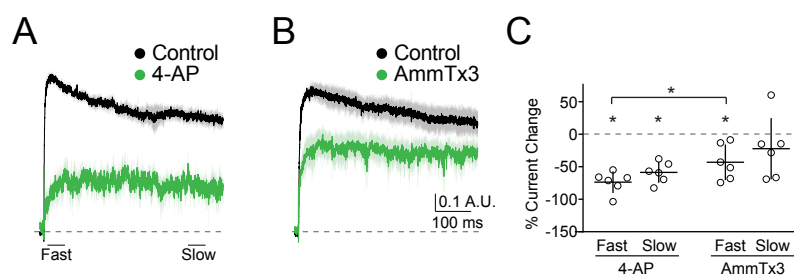

Figure 3 S2



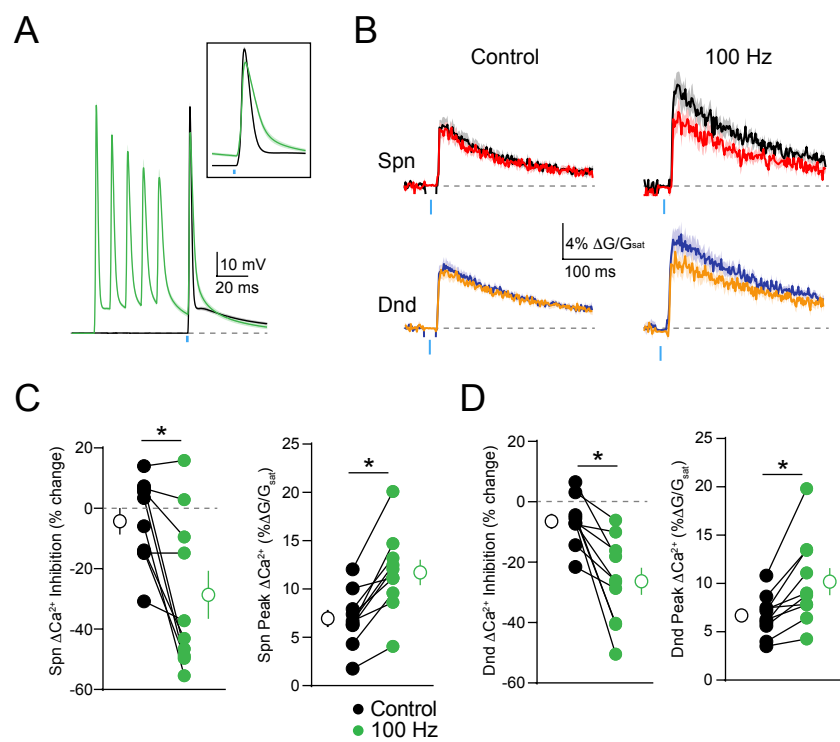

Figure 4

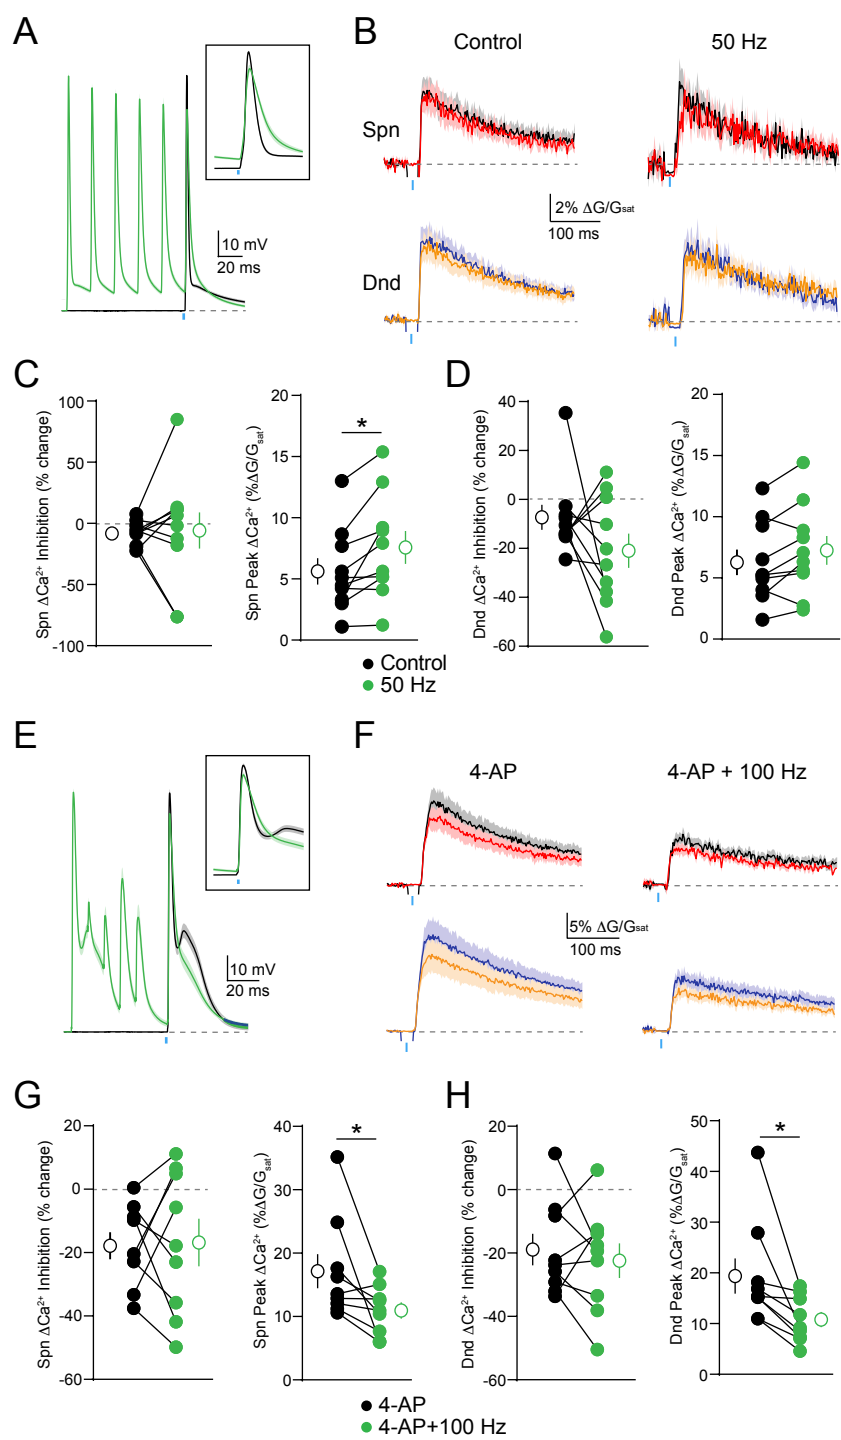

Figure 4 S1

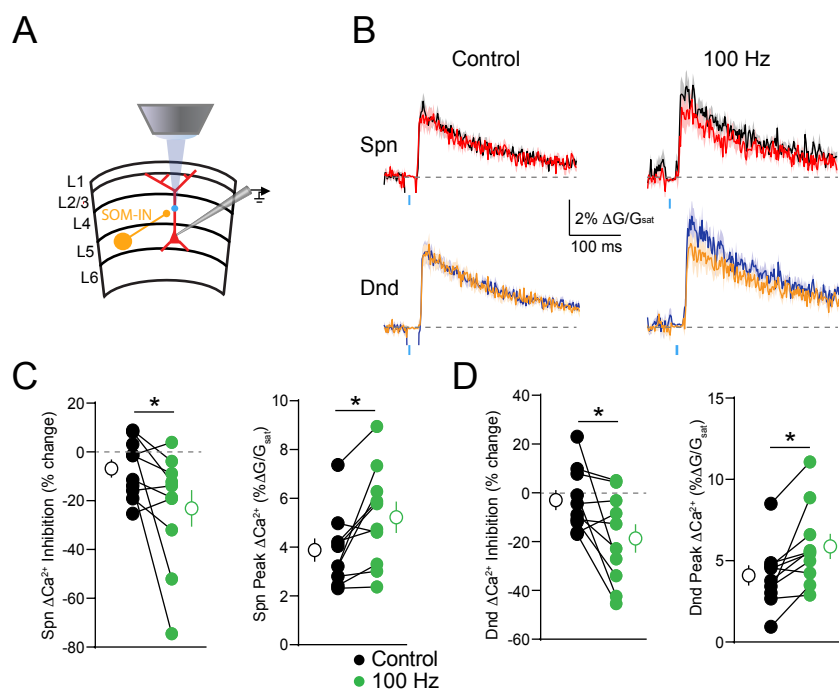

Figure 5

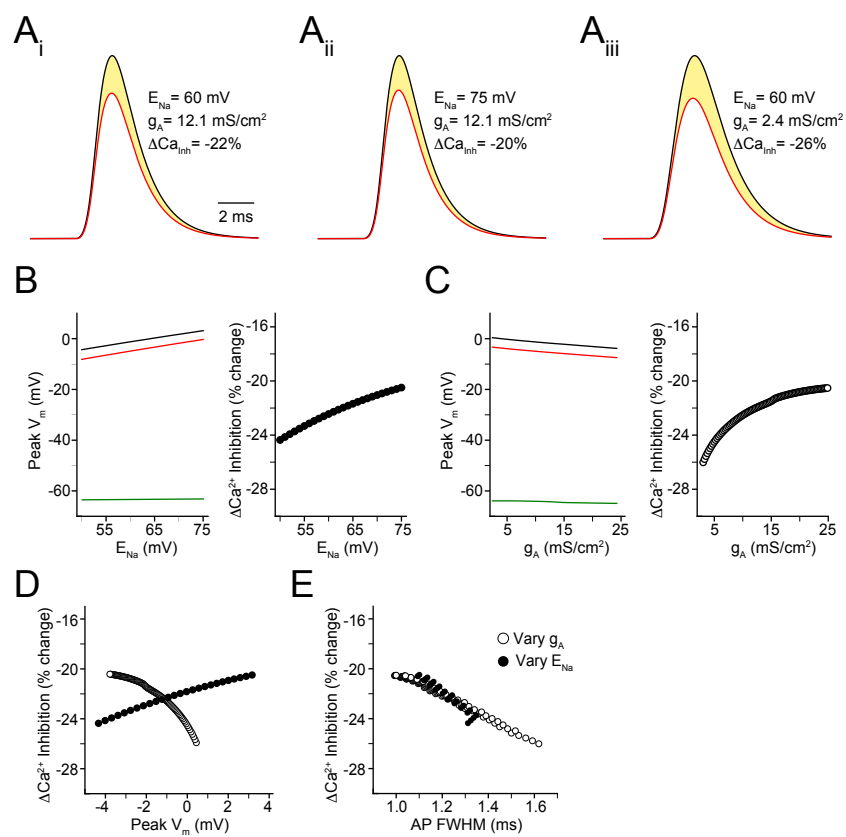

Figure 6
